# Supplementary material for: Impact of contrasting fertilizer technologies on N dynamics from subsurface bands of “pure” or blended fertilizer applications
Source: Copernicus journal article supplement (doi:10.5194/soil-9-243-2023), 2023-05-10
Supplement: Supplementary file 1 [file soil-9-243-2023-supplement.pdf]

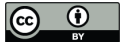

*Supplement of*

## **Impact of contrasting fertilizer technologies on N dynamics from subsurface bands of “pure” or blended fertilizer applications**

**Chelsea K. Janke and Michael J. Bell**

*Correspondence to:* Chelsea K. Janke ([c.stroppiana@uq.edu.au](mailto:c.stroppiana@uq.edu.au))

The copyright of individual parts of the supplement might differ from the article licence.

## Supplementary Material

The supplementary material presents data that are not otherwise presented in the manuscript, but which aids in interpretation of results and / or provides important background information (**Part A**); and the output of statistical analysis for all datasets, some of which is not presented in the manuscript due to complexity (**Part B**).

### Supplementary Material Part A

#### Supplementary data

Data that are not otherwise presented in the manuscript, but which aids in interpretation of results and / or provides important background information is presented in this section of the Supplementary Material.

#### Urea-N

No urea-N was detected at any time in either Ferralsol or Vertisol in untreated soil.

#### Mineral N

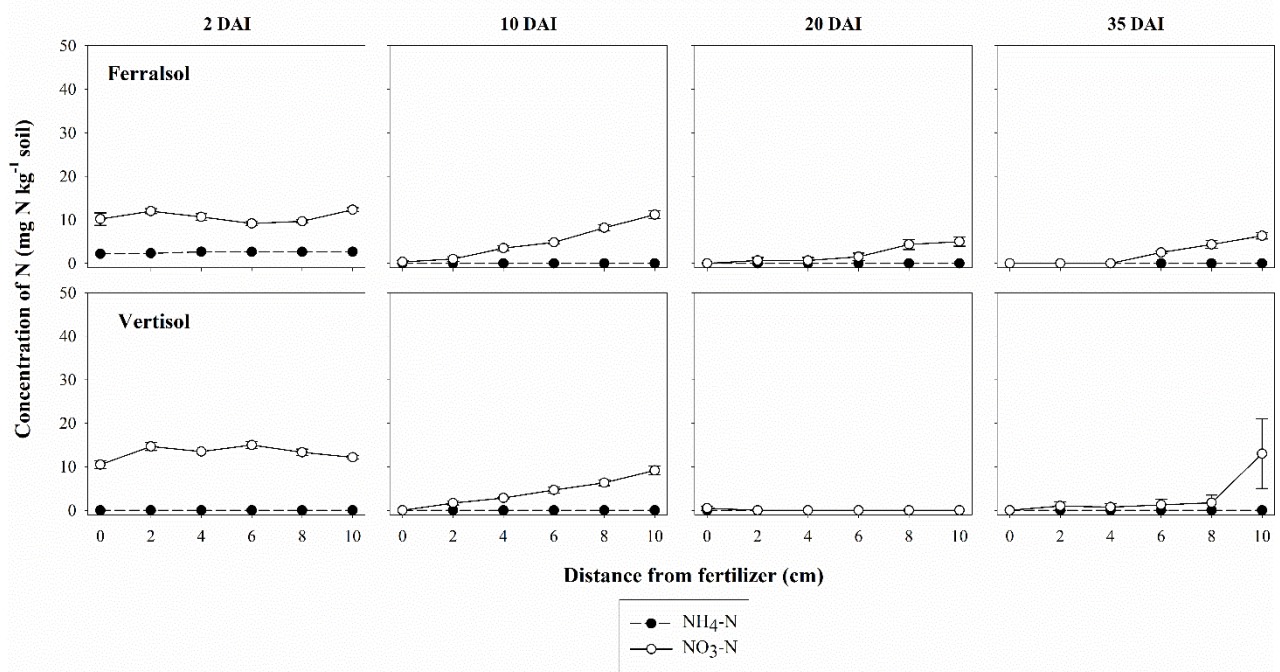

**Fig. S1** Concentration of mineral N species in untreated Ferralsol and Vertisol over time (days after incubation; DAI). Vertical bars represent the standard error of the means (n = 3) presented for each time × location. Note the y-axis scale varies from that of Figures 5 & 6 in the manuscript.



## Supplementary Material Part B

*Statistical analysis not presented in manuscript*

Analysis of concentrations of the various N species (urea-N, mineral N and aqueous NH<sub>3</sub>) and chemical data (pH<sub>1:5w</sub> and EC<sub>1:5w</sub>) was conducted by a three-way ANOVA for each soil with time, treatment (N-fertilizers excluding the ON control treatment), and distance from fertosphere as factors. The analysis was conducted with the ON treatment excluded to avoid masking effects of values associated with untreated soil. Tukey's HSD method ( $P < 0.05$ ) was used to test means for significant interaction effects. Statistical output including: factor information, ANOVA tables, model summaries and the results of the significant interaction effects are presented below for all datasets.

### Urea-N

#### Factor Information

| Factor    | Type  | Levels | Values                                                                            |
|-----------|-------|--------|-----------------------------------------------------------------------------------|
| Treatment | Fixed | 6      | 1:2 ENTEC:Agromaster, 2:1 ENTEC Agromaster, Agromaster Tropical, ENTEC, POC, Urea |
| Zone      | Fixed | 6      | 0, 2, 4, 6, 8, 10                                                                 |
| Time      | Fixed | 3      | 10, 35, 60                                                                        |

### Ferralsol

#### Analysis of Variance

| Source              | DF  | Adj SS | Adj MS  | F-Value | P-Value |
|---------------------|-----|--------|---------|---------|---------|
| Treatment           | 5   | 76489  | 15297.8 | 19.16   | 0.000   |
| Zone                | 5   | 301630 | 60326.1 | 75.57   | 0.000   |
| Time                | 2   | 5623   | 2811.3  | 3.52    | 0.033   |
| Treatment*Zone      | 25  | 353605 | 14144.2 | 17.72   | 0.000   |
| Treatment*Time      | 10  | 15573  | 1557.3  | 1.95    | 0.045   |
| Zone*Time           | 10  | 35102  | 3510.2  | 4.40    | 0.000   |
| Treatment*Zone*Time | 50  | 88628  | 1772.6  | 2.22    | 0.000   |
| Error               | 119 | 94991  | 798.2   |         |         |
| Total               | 226 | 943797 |         |         |         |

#### Model Summary

| S       | R-sq   | R-sq(adj) | R-sq(pred) |
|---------|--------|-----------|------------|
| 28.2532 | 89.94% | 80.89%    | *          |

## Tukey Pairwise Comparisons: Treatment Grouping Information Using the Tukey Method and 95% Confidence

| Treatment            | N  | Mean    | Grouping |
|----------------------|----|---------|----------|
| POC                  | 36 | 49.0464 | A        |
| Agromaster Tropical  | 36 | 34.5637 | A        |
| 1:2 ENTEC:Agromaster | 36 | 14.8629 | B        |
| 2:1 ENTEC Agromater  | 35 | 5.3523  | B        |
| Urea                 | 48 | 0.0476  | B        |
| ENTEC                | 36 | 0.0439  | B        |

Means that do not share a letter are significantly different.

## Tukey Pairwise Comparisons: Zone Grouping Information Using the Tukey Method and 95% Confidence

| Zone | N  | Mean    | Grouping |
|------|----|---------|----------|
| 0    | 38 | 99.2806 | A        |
| 2    | 37 | 4.5224  | B        |
| 4    | 38 | 0.0328  | B        |
| 6    | 38 | 0.0276  | B        |
| 8    | 38 | 0.0269  | B        |
| 10   | 38 | 0.0265  | B        |

Means that do not share a letter are significantly different.

## Tukey Pairwise Comparisons: Time Grouping Information Using the Tukey Method and 95% Confidence

| Time | N  | Mean    | Grouping |
|------|----|---------|----------|
| 35   | 77 | 21.8405 | A        |
| 60   | 72 | 19.7510 | A B      |
| 10   | 78 | 10.3669 | B        |

Means that do not share a letter are significantly different.

Means that do not share a letter are significantly different.

## Tukey Pairwise Comparisons: Treatment\*Zone\*Time Grouping Information Using the Tukey Method and 95% Confidence

| Treatment*Zone*Time      | N | Mean  | Grouping |
|--------------------------|---|-------|----------|
| POC 0 35                 | 2 | 453.5 | A        |
| Agromaster Tropical 0 60 | 2 | 269   | B        |

|                           |   |       |     |
|---------------------------|---|-------|-----|
| POC 0 60                  | 2 | 260.5 | B   |
| Agromaster Tropical 0 35  | 2 | 208   | BC  |
| POC 0 10                  | 2 | 161   | BCD |
| 1:2 ENTEC:Agromaster 0 35 | 2 | 106.8 | CDE |
| 2:1 ENTEC Agromater 0 60  | 2 | 88.75 | CDE |
| 1:2 ENTEC:Agromaster 0 60 | 2 | 78.85 | DE  |
| 1:2 ENTEC:Agromaster 0 10 | 2 | 77.65 | DE  |
| Agromaster Tropical 0 10  | 2 | 76.2  | DE  |
| Agromaster Tropical 2 10  | 2 | 51    | DE  |
| Agromaster Tropical 2 35  | 2 | 8.82  | E   |
| Agromaster Tropical 2 60  | 2 | 8.82  | E   |
| 2:1 ENTEC Agromater 0 10  | 2 | 6.13  | E   |
| POC 2 60                  | 2 | 3.875 | E   |
| POC 2 35                  | 2 | 3.64  | E   |
| 1:2 ENTEC:Agromaster 2 35 | 2 | 3.238 | E   |
| 1:2 ENTEC:Agromaster 2 60 | 2 | 0.632 | E   |
| 2:1 ENTEC Agromater 2 60  | 2 | 0.523 | E   |
| 2:1 ENTEC Agromater 2 35  | 1 | 0.262 | E   |
| ENTECC 0 10               | 2 | 0.234 | E   |
| 2:1 ENTEC Agromater 2 10  | 2 | 0.184 | E   |
| Urea 8 35                 | 3 | 0.167 | E   |
| Agromaster Tropical 4 35  | 2 | 0.147 | E   |
| POC 2 10                  | 2 | 0.143 | E   |
| Urea 0 35                 | 3 | 0.127 | E   |
| Urea 0 10                 | 3 | 0.118 | E   |
| 1:2 ENTEC:Agromaster 4 35 | 2 | 0.116 | E   |
| 2:1 ENTEC Agromater 8 35  | 2 | 0.11  | E   |
| ENTECC 2 10               | 2 | 0.11  | E   |
| Urea 6 35                 | 3 | 0.102 | E   |
| 1:2 ENTEC:Agromaster 6 10 | 2 | 0.097 | E   |
| POC 10 10                 | 2 | 0.097 | E   |

|                               |   |       |   |
|-------------------------------|---|-------|---|
| Urea 10 35                    | 3 | 0.091 | E |
| 2:1 ENTEC Agromater 6 35      | 2 | 0.089 | E |
| 2:1 ENTEC Agromater 0 35      | 2 | 0.088 | E |
| ENTEC 0 35                    | 2 | 0.082 | E |
| Agromaster Tropical 6 35      | 2 | 0.072 | E |
| 2:1 ENTEC Agromater 10 35     | 2 | 0.068 | E |
| Urea 2 35                     | 3 | 0.064 | E |
| ENTEC 8 35                    | 2 | 0.063 | E |
| ENTEC 2 35                    | 2 | 0.061 | E |
| Urea 4 35                     | 3 | 0.06  | E |
| Agromaster Tropical 10 35     | 2 | 0.058 | E |
| ENTEC 4 35                    | 2 | 0.058 | E |
| ENTEC 10 35                   | 2 | 0.056 | E |
| Urea 4 10                     | 3 | 0.056 | E |
| 1:2 ENTEC:Agromaster 10<br>35 | 2 | 0.055 | E |
| 2:1 ENTEC Agromater 8 10      | 2 | 0.053 | E |
| ENTEC 6 35                    | 2 | 0.052 | E |
| ENTEC 4 10                    | 2 | 0.052 | E |
| 1:2 ENTEC:Agromaster 6 35     | 2 | 0.047 | E |
| 2:1 ENTEC Agromater 4 35      | 2 | 0.045 | E |
| POC 4 35                      | 2 | 0.042 | E |
| 1:2 ENTEC:Agromaster 8 35     | 2 | 0.036 | E |
| Urea 2 10                     | 3 | 0.031 | E |
| Agromaster Tropical 8 35      | 2 | 0.029 | E |
| 2:1 ENTEC Agromater 10 10     | 2 | 0.028 | E |
| Urea 8 10                     | 3 | 0.027 | E |
| POC 6 60                      | 2 | 0.023 | E |
| ENTEC 4 60                    | 2 | 0.016 | E |
| POC 6 35                      | 2 | 0.014 | E |
| Urea 0 60                     | 2 | 0.013 | E |

|                            |   |       |   |
|----------------------------|---|-------|---|
| 2:1 ENTEC Agromater 10 60  | 2 | 0.011 | E |
| 1:2 ENTEC:Agromaster 10 60 | 2 | 0.011 | E |
| ENTE C 0 60                | 2 | 0.009 | E |
| Urea 6 10                  | 3 | 0     | E |
| 2:1 ENTEC Agromater 6 10   | 2 | 0     | E |
| Urea 10 60                 | 2 | 0     | E |
| Agromaster Tropical 4 10   | 2 | 0     | E |
| 1:2 ENTEC:Agromaster 2 10  | 2 | 0     | E |
| Agromaster Tropical 8 10   | 2 | 0     | E |
| Agromaster Tropical 6 10   | 2 | 0     | E |
| 1:2 ENTEC:Agromaster 8 10  | 2 | 0     | E |
| ENTE C 8 10                | 2 | 0     | E |
| Urea 10 10                 | 3 | 0     | E |
| Agromaster Tropical 8 60   | 2 | 0     | E |
| ENTE C 8 60                | 2 | 0     | E |
| 2:1 ENTEC Agromater 8 60   | 2 | 0     | E |
| Agromaster Tropical 10 10  | 2 | 0     | E |
| 1:2 ENTEC:Agromaster 6 60  | 2 | 0     | E |
| 2:1 ENTEC Agromater 4 10   | 2 | 0     | E |
| Agromaster Tropical 6 60   | 2 | 0     | E |
| 1:2 ENTEC:Agromaster 8 60  | 2 | 0     | E |
| POC 8 60                   | 2 | 0     | E |
| Urea 4 60                  | 2 | 0     | E |
| 2:1 ENTEC Agromater 4 60   | 2 | 0     | E |
| Urea 8 60                  | 2 | 0     | E |
| Agromaster Tropical 4 60   | 2 | 0     | E |
| 2:1 ENTEC Agromater 6 60   | 2 | 0     | E |
| 1:2 ENTEC:Agromaster 4 10  | 2 | 0     | E |
| Agromaster Tropical 10 60  | 2 | 0     | E |
| ENTE C 10 60               | 2 | 0     | E |



|                               |   |   |   |
|-------------------------------|---|---|---|
| POC 4 60                      | 2 | 0 | E |
| ENTEC 6 10                    | 2 | 0 | E |
| ENTEC 2 60                    | 2 | 0 | E |
| ENTEC 6 60                    | 2 | 0 | E |
| 1:2 ENTEC:Agromaster 4 60     | 2 | 0 | E |
| Urea 6 60                     | 2 | 0 | E |
| POC 4 10                      | 2 | 0 | E |
| Urea 2 60                     | 2 | 0 | E |
| ENTEC 10 10                   | 2 | 0 | E |
| POC 6 10                      | 2 | 0 | E |
| POC 8 35                      | 2 | 0 | E |
| POC 8 10                      | 2 | 0 | E |
| POC 10 35                     | 2 | 0 | E |
| POC 10 60                     | 2 | 0 | E |
| 1:2 ENTEC:Agromaster 10<br>10 | 2 | 0 | E |

Means that do not share a letter are significantly different.

## Vertisol

### Analysis of Variance

| Source              | DF  | Adj SS  | Adj MS | F-Value | P-Value |
|---------------------|-----|---------|--------|---------|---------|
| Treatment           | 5   | 133281  | 26656  | 18.85   | 0.000   |
| Zone                | 5   | 938039  | 187608 | 132.66  | 0.000   |
| Time                | 2   | 43497   | 21749  | 15.38   | 0.000   |
| Treatment*Zone      | 25  | 662528  | 26501  | 18.74   | 0.000   |
| Treatment*Time      | 10  | 78374   | 7837   | 5.54    | 0.000   |
| Zone*Time           | 10  | 211943  | 21194  | 14.99   | 0.000   |
| Treatment*Zone*Time | 50  | 382604  | 7652   | 5.41    | 0.000   |
| Error               | 87  | 123033  | 1414   |         |         |
| Total               | 194 | 2249547 |        |         |         |

### Model Summary

| S       | R-sq   | R-sq(adj) | R-sq(pred) |
|---------|--------|-----------|------------|
| 37.6055 | 94.53% | 87.80%    | *          |

### Tukey Pairwise Comparisons: Treatment Grouping Information Using the Tukey Method and 95% Confidence

| Treatment            | N  | Mean    | Grouping |
|----------------------|----|---------|----------|
| POC                  | 30 | 70.0322 | A        |
| Agromaster Tropical  | 29 | 61.5475 | A        |
| 1:2 ENTEC:Agromaster | 34 | 48.1087 | A        |
| 2:1 ENTEC Agromater  | 36 | 19.6047 | B        |
| ENTECC               | 30 | 0.0425  | B        |
| Urea                 | 36 | 0.0287  | B        |

Means that do not share a letter are significantly different.

### Tukey Pairwise Comparisons: Zone Grouping Information Using the Tukey Method and 95% Confidence

| Zone | N  | Mean    | Grouping |
|------|----|---------|----------|
| 0    | 32 | 198.208 | A        |
| 2    | 32 | 0.975   | B        |
| 4    | 33 | 0.065   | B        |
| 8    | 33 | 0.053   | B        |
| 10   | 32 | 0.044   | B        |
| 6    | 33 | 0.018   | B        |

Means that do not share a letter are significantly different.

### Tukey Pairwise Comparisons: Time Grouping Information Using the Tukey Method and 95% Confidence

| Time | N  | Mean    | Grouping |
|------|----|---------|----------|
| 35   | 52 | 51.5082 | A        |
| 60   | 65 | 34.6790 | A        |
| 10   | 78 | 13.4949 | B        |

Means that do not share a letter are significantly different.

### Tukey Pairwise Comparisons: Treatment\*Zone\*Time Grouping Information Using the Tukey Method and 95% Confidence

| Treatment*Zone*Time | N | Mean | Grouping |
|---------------------|---|------|----------|
|---------------------|---|------|----------|

|                            |   |        |     |
|----------------------------|---|--------|-----|
| POC 0 35                   | 1 | 616    | A   |
| Agromaster Tropical 0 35   | 1 | 600    | A   |
| 1:2 ENTEC:Agromaster 0 35  | 1 | 494    | AB  |
| Agromaster Tropical 0 60   | 2 | 487    | AB  |
| POC 0 10                   | 2 | 436.5  | AB  |
| 1:2 ENTEC:Agromaster 0 60  | 2 | 342.5  | BC  |
| POC 0 60                   | 2 | 205.05 | CD  |
| 2:1 ENTEC Agromater 0 60   | 2 | 198.35 | CDE |
| 2:1 ENTEC Agromater 0 35   | 2 | 143.5  | DEF |
| 1:2 ENTEC:Agromaster 0 10  | 2 | 28.5   | EF  |
| Agromaster Tropical 0 10   | 2 | 14.505 | F   |
| 2:1 ENTEC Agromater 2 60   | 2 | 9.195  | F   |
| Agromaster Tropical 2 60   | 2 | 6.35   | F   |
| 2:1 ENTEC Agromater 0 10   | 2 | 1.84   | F   |
| POC 2 10                   | 2 | 1.34   | F   |
| POC 10 35                  | 1 | 0.795  | DEF |
| POC 8 10                   | 2 | 0.448  | F   |
| POC 4 10                   | 2 | 0.446  | F   |
| ENTEC 4 10                 | 2 | 0.433  | F   |
| Urea 2 10                  | 3 | 0.346  | F   |
| 1:2 ENTEC:Agromaster 8 10  | 2 | 0.34   | F   |
| ENTEC 6 10                 | 2 | 0.333  | F   |
| 1:2 ENTEC:Agromaster 2 10  | 2 | 0.321  | F   |
| 1:2 ENTEC:Agromaster 4 10  | 2 | 0.296  | F   |
| Urea 8 10                  | 3 | 0.17   | F   |
| 1:2 ENTEC:Agromaster 10 10 | 2 | 0      | F   |
| 1:2 ENTEC:Agromaster 10 35 | 2 | 0      | F   |
| ENTEC 10 35                | 1 | 0      | DEF |
| 2:1 ENTEC Agromater 2 10   | 2 | 0      | F   |
| ENTEC 10 60                | 2 | 0      | F   |
| ENTEC 2 10                 | 2 | 0      | F   |
| Urea 2 60                  | 1 | 0      | DEF |
| 2:1 ENTEC Agromater 2 35   | 2 | 0      | F   |
| POC 4 35                   | 1 | 0      | DEF |
| Urea 10 60                 | 1 | 0      | DEF |
| ENTEC 6 35                 | 1 | 0      | DEF |
| Urea 0 35                  | 2 | 0      | F   |
| Agromaster Tropical 10 10  | 2 | 0      | F   |
| ENTEC 2 35                 | 1 | 0      | DEF |
| 2:1 ENTEC Agromater 4 10   | 2 | 0      | F   |
| 1:2 ENTEC:Agromaster 10 60 | 2 | 0      | F   |
| ENTEC 8 10                 | 2 | 0      | F   |
| POC 2 35                   | 1 | 0      | DEF |
| Agromaster Tropical 2 10   | 2 | 0      | F   |
| ENTEC 4 35                 | 1 | 0      | DEF |
| Agromaster Tropical 2 35   | 1 | 0      | DEF |

|                           |   |   |     |
|---------------------------|---|---|-----|
| POC 10 10                 | 2 | 0 | F   |
| ENTEC 8 35                | 1 | 0 | DEF |
| 2:1 ENTEC Agromater 6 35  | 2 | 0 | F   |
| 1:2 ENTEC:Agromaster 2 60 | 2 | 0 | F   |
| 1:2 ENTEC:Agromaster 6 60 | 2 | 0 | F   |
| POC 8 60                  | 2 | 0 | F   |
| 1:2 ENTEC:Agromaster 6 35 | 2 | 0 | F   |
| 2:1 ENTEC Agromater 4 35  | 2 | 0 | F   |
| POC 2 60                  | 2 | 0 | F   |
| 2:1 ENTEC Agromater 6 10  | 2 | 0 | F   |
| POC 4 60                  | 2 | 0 | F   |
| POC 6 35                  | 1 | 0 | DEF |
| 2:1 ENTEC Agromater 6 60  | 2 | 0 | F   |
| Urea 4 10                 | 3 | 0 | F   |
| 1:2 ENTEC:Agromaster 4 35 | 2 | 0 | F   |
| Agromaster Tropical 6 10  | 2 | 0 | F   |
| Agromaster Tropical 8 60  | 2 | 0 | F   |
| 1:2 ENTEC:Agromaster 2 35 | 1 | 0 | DEF |
| Urea 2 35                 | 2 | 0 | F   |
| Agromaster Tropical 6 35  | 1 | 0 | DEF |
| ENTEC 0 10                | 2 | 0 | F   |
| Urea 4 60                 | 1 | 0 | DEF |
| 2:1 ENTEC Agromater 8 35  | 2 | 0 | F   |
| ENTEC 4 60                | 2 | 0 | F   |
| 1:2 ENTEC:Agromaster 4 60 | 2 | 0 | F   |
| Urea 6 35                 | 2 | 0 | F   |
| Agromaster Tropical 4 10  | 2 | 0 | F   |
| ENTEC 2 60                | 2 | 0 | F   |
| 2:1 ENTEC Agromater 4 60  | 2 | 0 | F   |
| ENTEC 8 60                | 2 | 0 | F   |
| 2:1 ENTEC Agromater 8 60  | 2 | 0 | F   |
| 1:2 ENTEC:Agromaster 8 60 | 2 | 0 | F   |
| POC 6 60                  | 2 | 0 | F   |
| Agromaster Tropical 8 10  | 2 | 0 | F   |
| 1:2 ENTEC:Agromaster 6 10 | 2 | 0 | F   |
| POC 6 10                  | 2 | 0 | F   |
| POC 10 60                 | 2 | 0 | F   |
| 2:1 ENTEC Agromater 10 60 | 2 | 0 | F   |
| 2:1 ENTEC Agromater 8 10  | 2 | 0 | F   |
| ENTEC 6 60                | 2 | 0 | F   |
| Urea 6 10                 | 3 | 0 | F   |
| Agromaster Tropical 4 60  | 2 | 0 | F   |
| POC 8 35                  | 1 | 0 | DEF |
| Urea 8 60                 | 1 | 0 | DEF |
| Agromaster Tropical 8 35  | 1 | 0 | DEF |
| Urea 8 35                 | 2 | 0 | F   |

|                           |   |   |     |
|---------------------------|---|---|-----|
| Agromaster Tropical 4 35  | 1 | 0 | DEF |
| 2:1 ENTEC Agromater 10 35 | 2 | 0 | F   |
| Agromaster Tropical 6 60  | 2 | 0 | F   |
| Urea 4 35                 | 2 | 0 | F   |
| 1:2 ENTEC:Agromaster 8 35 | 2 | 0 | F   |
| Urea 0 10                 | 3 | 0 | F   |
| Urea 10 10                | 3 | 0 | F   |
| Urea 6 60                 | 1 | 0 | DEF |
| Urea 0 60                 | 1 | 0 | DEF |
| ENTECC 10 10              | 2 | 0 | F   |
| Agromaster Tropical 10 35 | 1 | 0 | DEF |
| ENTECC 0 60               | 2 | 0 | F   |
| Agromaster Tropical 10 60 | 1 | 0 | DEF |
| 2:1 ENTEC Agromater 10 10 | 2 | 0 | F   |
| Urea 10 35                | 2 | 0 | F   |
| ENTECC 0 35               | 1 | 0 | DEF |

Means that do not share a letter are significantly different.

## NH<sub>3</sub>-N

### Factor Information

| Factor    | Type  | Levels | Values                                                                            |
|-----------|-------|--------|-----------------------------------------------------------------------------------|
| Treatment | Fixed | 6      | 1:2 ENTEC:Agromaster, 2:1 ENTEC Agromater, Agromaster Tropical, ENTECC, POC, Urea |
| Zone      | Fixed | 6      | 0, 2, 4, 6, 8, 10                                                                 |
| Time      | Fixed | 3      | 10, 35, 60                                                                        |

## Ferralsol

### Analysis of Variance

| Source         | DF | Adj SS | Adj MS | F-Value | P-Value |
|----------------|----|--------|--------|---------|---------|
| Treatment      | 5  | 25.71  | 5.142  | 3.24    | 0.009   |
| Zone           | 5  | 192.20 | 38.440 | 24.25   | 0.000   |
| Time           | 2  | 13.93  | 6.965  | 4.39    | 0.014   |
| Treatment*Zone | 25 | 136.24 | 5.450  | 3.44    | 0.000   |
| Treatment*Time | 10 | 35.00  | 3.500  | 2.21    | 0.022   |
| Zone*Time      | 10 | 20.77  | 2.077  | 1.31    | 0.233   |

|                     |     |        |       |      |       |
|---------------------|-----|--------|-------|------|-------|
| Treatment*Zone*Time | 50  | 107.51 | 2.150 | 1.36 | 0.091 |
| Error               | 120 | 190.25 | 1.585 |      |       |
| Total               | 227 | 719.73 |       |      |       |

## Model Summary

| S       | R-sq   | R-sq(adj) | R-sq(pred) |
|---------|--------|-----------|------------|
| 1.25914 | 73.57% | 50.00%    | 0.00%      |

## Tukey Pairwise Comparisons: Treatment Grouping Information Using the Tukey Method and 95% Confidence

| Treatment            | N  | Mean    | Grouping |
|----------------------|----|---------|----------|
| 1:2 ENTEC:Agromaster | 36 | 1.36847 | A        |
| 2:1 ENTEC Agromater  | 36 | 0.61007 | A B      |
| POC                  | 36 | 0.58107 | A B      |
| ENTEC                | 36 | 0.53659 | A B      |
| Urea                 | 48 | 0.53582 | B        |
| Agromaster Tropical  | 36 | 0.24700 | B        |

Means that do not share a letter are significantly different.

## Tukey Pairwise Comparisons: Zone Grouping Information Using the Tukey Method and 95% Confidence

| Zone | N  | Mean    | Grouping |
|------|----|---------|----------|
| 0    | 38 | 2.62920 | A        |
| 2    | 38 | 0.76986 | B        |
| 4    | 38 | 0.36160 | B        |
| 6    | 38 | 0.11289 | B        |
| 8    | 38 | 0.00522 | B        |
| 10   | 38 | 0.00024 | B        |

Means that do not share a letter are significantly different.

## Tukey Pairwise Comparisons: Time Grouping Information Using the Tukey Method and 95% Confidence

| Time | N  | Mean     | Grouping |
|------|----|----------|----------|
| 10   | 78 | 0.984430 | A        |
| 60   | 72 | 0.554676 | A B      |

35 78 0.400398 B

*Means that do not share a letter are significantly different.*

## Tukey Pairwise Comparisons: Treatment\*Zone Grouping Information Using the Tukey Method and 95% Confidence

| Treatment*Zone          | N | Mean    | Grouping |
|-------------------------|---|---------|----------|
| 1:2 ENTEC:Agromaster 0  | 6 | 6.99377 | A        |
| POC 0                   | 6 | 2.88094 | B        |
| 2:1 ENTEC Agromater 0   | 6 | 2.06079 | BC       |
| Agromaster Tropical 0   | 6 | 1.45449 | BC       |
| Urea 0                  | 8 | 1.23546 | BC       |
| ENTECC 0                | 6 | 1.14977 | BC       |
| 1:2 ENTEC:Agromaster 2  | 6 | 1.03608 | BC       |
| 2:1 ENTEC Agromater 2   | 6 | 1.02463 | BC       |
| ENTECC 2                | 6 | 1.01307 | BC       |
| Urea 2                  | 8 | 0.99259 | BC       |
| ENTECC 4                | 6 | 0.72596 | BC       |
| Urea 4                  | 8 | 0.68379 | BC       |
| POC 2                   | 6 | 0.52538 | BC       |
| 2:1 ENTEC Agromater 4   | 6 | 0.50023 | BC       |
| ENTECC 6                | 6 | 0.31569 | BC       |
| Urea 6                  | 8 | 0.28599 | BC       |
| 1:2 ENTEC:Agromaster 4  | 6 | 0.17968 | BC       |
| POC 4                   | 6 | 0.07985 | BC       |
| 2:1 ENTEC Agromater 6   | 6 | 0.07419 | BC       |
| Agromaster Tropical 2   | 6 | 0.02739 | BC       |
| Urea 8                  | 8 | 0.01652 | C        |
| ENTECC 8                | 6 | 0.01431 | C        |
| 1:2 ENTEC:Agromaster 6  | 6 | 0.00124 | C        |
| ENTECC 10               | 6 | 0.00072 | C        |
| Urea 10                 | 8 | 0.00058 | C        |
| 2:1 ENTEC Agromater 8   | 6 | 0.00046 | C        |
| POC 6                   | 6 | 0.00021 | C        |
| Agromaster Tropical 4   | 6 | 0.0001  | C        |
| 2:1 ENTEC Agromater 10  | 6 | 0.0001  | C        |
| 1:2 ENTEC:Agromaster 8  | 6 | 0.00004 | C        |
| POC 8                   | 6 | 0.00002 | C        |
| 1:2 ENTEC:Agromaster 10 | 6 | 0.00001 | C        |
| Agromaster Tropical 6   | 6 | 0.00001 | C        |
| POC 10                  | 6 | 0       | C        |
| Agromaster Tropical 8   | 6 | 0       | C        |
| Agromaster Tropical 10  | 6 | 0       | C        |

*Means that do not share a letter are significantly different.*

## Tukey Pairwise Comparisons: Treatment\*Time Grouping Information Using the Tukey Method and 95% Confidence

| Treatment*Time             | N  | Mean    | Grouping |
|----------------------------|----|---------|----------|
| 1:2 ENTEC:Agromaster<br>60 | 12 | 2.30928 | A        |
| Urea 10                    | 18 | 1.36966 | AB       |
| ENTEK 10                   | 12 | 1.35338 | AB       |
| 2:1 ENTEC Agromater<br>10  | 12 | 1.00596 | AB       |
| 1:2 ENTEC:Agromaster<br>10 | 12 | 0.99289 | AB       |
| POC 10                     | 12 | 0.94261 | AB       |
| 1:2 ENTEC:Agromaster<br>35 | 12 | 0.80324 | AB       |
| 2:1 ENTEC Agromater<br>35  | 12 | 0.55872 | AB       |
| POC 35                     | 12 | 0.40118 | B        |
| POC 60                     | 12 | 0.3994  | B        |
| Agromaster Tropical 60     | 12 | 0.30433 | B        |
| 2:1 ENTEC Agromater<br>60  | 12 | 0.26552 | B        |
| Agromaster Tropical 10     | 12 | 0.24208 | B        |
| Urea 35                    | 18 | 0.22588 | B        |
| ENTEK 35                   | 12 | 0.21878 | B        |
| Agromaster Tropical 35     | 12 | 0.19459 | B        |
| ENTEK 60                   | 12 | 0.0376  | B        |
| Urea 60                    | 12 | 0.01192 | B        |

Means that do not share a letter are significantly different.

## Vertisol

### Analysis of Variance

| Source              | DF  | Adj SS  | Adj MS  | F-Value | P-Value |
|---------------------|-----|---------|---------|---------|---------|
| Treatment           | 5   | 64.21   | 12.842  | 2.28    | 0.051   |
| Zone                | 5   | 2292.61 | 458.521 | 81.36   | 0.000   |
| Time                | 2   | 179.46  | 89.732  | 15.92   | 0.000   |
| Treatment*Zone      | 25  | 350.63  | 14.025  | 2.49    | 0.001   |
| Treatment*Time      | 10  | 128.24  | 12.824  | 2.28    | 0.018   |
| Zone*Time           | 10  | 331.61  | 33.161  | 5.88    | 0.000   |
| Treatment*Zone*Time | 50  | 432.47  | 8.649   | 1.53    | 0.031   |
| Error               | 118 | 664.99  | 5.635   |         |         |



Total 225 4593.19

## Model Summary

| S       | R-sq   | R-sq(adj) | R-sq(pred) |
|---------|--------|-----------|------------|
| 2.37392 | 85.52% | 72.39%    | *          |

## Tukey Pairwise Comparisons: Treatment Grouping Information Using the Tukey Method and 95% Confidence

| Treatment            | N  | Mean    | Grouping |
|----------------------|----|---------|----------|
| 2:1 ENTEC Agromater  | 36 | 3.12561 | A        |
| ENTEK                | 36 | 2.41296 | A        |
| 1:2 ENTEC:Agromaster | 36 | 2.34019 | A        |
| POC                  | 36 | 2.03461 | A        |
| Urea                 | 48 | 1.65039 | A        |
| Agromaster Tropical  | 34 | 1.48908 | A        |

Means that do not share a letter are significantly different.

## Tukey Pairwise Comparisons: Zone Grouping Information Using the Tukey Method and 95% Confidence

| Zone | N  | Mean    | Grouping |
|------|----|---------|----------|
| 0    | 37 | 9.05882 | A        |
| 2    | 38 | 3.15506 | B        |
| 4    | 38 | 0.74256 | C        |
| 6    | 38 | 0.07310 | C        |
| 8    | 38 | 0.01971 | C        |
| 10   | 37 | 0.00357 | C        |

Means that do not share a letter are significantly different.

## Tukey Pairwise Comparisons: Time Grouping Information Using the Tukey Method and 95% Confidence

| Time | N  | Mean    | Grouping |
|------|----|---------|----------|
| 10   | 78 | 3.35256 | A        |
| 35   | 78 | 2.02951 | B        |
| 60   | 70 | 1.14434 | B        |

Means that do not share a letter are significantly different.

## Tukey Pairwise Comparisons: Treatment\*Zone\*Time Grouping Information Using the Tukey Method and 95% Confidence

| Treatment*Zone*Time       | N | Mean    | Grouping |
|---------------------------|---|---------|----------|
| POC 0 10                  | 2 | 24.6907 | A        |
| 1:2 ENTEC:Agromaster 0 10 | 2 | 14.3605 | AB       |
| Agromaster Tropical 0 35  | 2 | 13.8198 | BC       |
| 2:1 ENTEC Agromater 0 35  | 2 | 12.7632 | BCDE     |
| 2:1 ENTEC Agromater 0 10  | 2 | 12.7319 | BCDE     |
| Urea 0 10                 | 3 | 12.3102 | BC E     |
| 2:1 ENTEC Agromater 0 60  | 2 | 11.597  | BCDEF    |
| 1:2 ENTEC:Agromaster 0 35 | 2 | 9.4484  | BCDEFGH  |
| Urea 2 10                 | 3 | 9.0053  | BCDEFG   |
| ENTEC 0 10                | 2 | 8.5719  | BCDEFGH  |
| Agromaster Tropical 0 10  | 2 | 8.3125  | BCDEFGH  |
| ENTEC 0 35                | 2 | 7.566   | BCDEFGH  |
| POC 0 35                  | 2 | 6.7845  | BCDEFGH  |
| ENTEC 2 35                | 2 | 6.4646  | BCDEFGH  |
| 2:1 ENTEC Agromater 2 10  | 2 | 6.3691  | BCDEFGH  |
| ENTEC 2 10                | 2 | 6.1858  | BCDEFGH  |
| 1:2 ENTEC:Agromaster 0 60 | 2 | 5.235   | BCDEFGH  |
| 2:1 ENTEC Agromater 2 35  | 2 | 4.8252  | BCDEFGH  |
| 2:1 ENTEC Agromater 2 60  | 2 | 4.782   | BCDEFGH  |
| ENTEC 0 60                | 2 | 4.7632  | BCDEFGH  |
| 1:2 ENTEC:Agromaster 2 10 | 2 | 4.6716  | BCDEFGH  |
| Agromaster Tropical 0 60  | 1 | 4.2435  | BCDEFGH  |
| 1:2 ENTEC:Agromaster 2 60 | 2 | 4.064   | BCDEFGH  |
| 1:2 ENTEC:Agromaster 2 35 | 2 | 3.9546  | BCDEFGH  |
| Urea 4 10                 | 3 | 3.4928  | D FGH    |
| ENTEC 4 10                | 2 | 3.414   | CDEFGH   |
| Urea 0 35                 | 3 | 2.9687  | FGH      |
| POC 0 60                  | 2 | 2.8795  | DEFGH    |
| ENTEC 2 60                | 2 | 2.4982  | D FGH    |
| ENTEC 4 35                | 2 | 2.263   | D FGH    |
| POC 2 10                  | 2 | 2.1891  | D FGH    |
| 2:1 ENTEC Agromater 4 10  | 2 | 2.0974  | FGH      |
| Urea 2 35                 | 3 | 1.2745  | GH       |
| ENTEC 6 10                | 2 | 0.6811  | GH       |
| ENTEC 4 60                | 2 | 0.6674  | GH       |
| 2:1 ENTEC Agromater 4 35  | 2 | 0.6333  | GH       |
| Urea 6 10                 | 3 | 0.5483  | GH       |
| 2:1 ENTEC Agromater 4 60  | 2 | 0.388   | GH       |
| Agromaster Tropical 2 10  | 2 | 0.3487  | GH       |
| ENTEC 8 10                | 2 | 0.2942  | GH       |
| 1:2 ENTEC:Agromaster 4 10 | 2 | 0.21    | GH       |

|                            |   |        |    |
|----------------------------|---|--------|----|
| 1:2 ENTEC:Agromaster 4 35  | 2 | 0.1695 | GH |
| 2:1 ENTEC Agromater 6 10   | 2 | 0.0647 | GH |
| Agromaster Tropical 2 35   | 2 | 0.0573 | GH |
| ENTEK 10 10                | 2 | 0.0546 | GH |
| Urea 8 10                  | 3 | 0.0531 | H  |
| POC 2 35                   | 2 | 0.044  | GH |
| POC 2 60                   | 2 | 0.0239 | GH |
| Urea 2 60                  | 2 | 0.0197 | GH |
| Urea 4 35                  | 3 | 0.0149 | H  |
| Agromaster Tropical 2 60   | 2 | 0.0136 | GH |
| Urea 0 60                  | 2 | 0.0122 | GH |
| POC 4 10                   | 2 | 0.0085 | GH |
| Urea 10 10                 | 3 | 0.0061 | H  |
| ENTEK 6 60                 | 2 | 0.0049 | GH |
| 1:2 ENTEC:Agromaster 6 10  | 2 | 0.0045 | GH |
| 2:1 ENTEC Agromater 8 10   | 2 | 0.0042 | GH |
| ENTEK 6 35                 | 2 | 0.0039 | GH |
| Agromaster Tropical 4 10   | 2 | 0.0033 | GH |
| 2:1 ENTEC Agromater 6 35   | 2 | 0.0032 | GH |
| 1:2 ENTEC:Agromaster 4 60  | 2 | 0.0024 | GH |
| Agromaster Tropical 6 10   | 2 | 0.0016 | GH |
| 1:2 ENTEC:Agromaster 6 35  | 2 | 0.0015 | GH |
| Agromaster Tropical 8 10   | 2 | 0.0013 | GH |
| 2:1 ENTEC Agromater 10 10  | 2 | 0.0013 | GH |
| Agromaster Tropical 10 10  | 2 | 0.0012 | GH |
| 1:2 ENTEC:Agromaster 8 10  | 2 | 0.0008 | GH |
| Urea 6 35                  | 3 | 0.0008 | H  |
| POC 4 35                   | 2 | 0.0008 | GH |
| POC 6 10                   | 2 | 0.0007 | GH |
| 1:2 ENTEC:Agromaster 10 10 | 2 | 0.0004 | GH |
| POC 8 10                   | 2 | 0.0004 | GH |
| 2:1 ENTEC Agromater 6 60   | 2 | 0.0004 | GH |
| POC 10 10                  | 2 | 0.0003 | GH |
| Urea 4 60                  | 2 | 0.0003 | GH |
| POC 4 60                   | 2 | 0.0003 | GH |
| 1:2 ENTEC:Agromaster 8 35  | 2 | 0.0002 | GH |
| Agromaster Tropical 4 35   | 2 | 0.0002 | GH |
| Agromaster Tropical 4 60   | 2 | 0.0002 | GH |
| ENTEK 8 60                 | 2 | 0.0001 | GH |
| Urea 8 35                  | 3 | 0.0001 | H  |
| ENTEK 8 35                 | 2 | 0.0001 | GH |
| POC 6 60                   | 2 | 0.0001 | GH |
| Agromaster Tropical 6 35   | 2 | 0.0001 | GH |
| 1:2 ENTEC:Agromaster 6 60  | 2 | 0.0001 | GH |
| POC 6 35                   | 2 | 0.0001 | GH |
| POC 10 60                  | 2 | 0.0001 | GH |

|                            |   |        |   |     |
|----------------------------|---|--------|---|-----|
| Agromaster Tropical 6 60   | 2 | 0.0001 |   | GH  |
| 2:1 ENTEC Agromater 10 60  | 2 | 0      |   | GH  |
| 1:2 ENTEC:Agromaster 10 35 | 2 | 0      |   | GH  |
| Urea 6 60                  | 2 | 0      |   | GH  |
| Agromaster Tropical 10 35  | 2 | 0      |   | GH  |
| 2:1 ENTEC Agromater 8 35   | 2 | 0      |   | GH  |
| 2:1 ENTEC Agromater 8 60   | 2 | 0      |   | GH  |
| POC 8 60                   | 2 | 0      |   | GH  |
| ENTECC 10 35               | 2 | 0      |   | GH  |
| 1:2 ENTEC:Agromaster 8 60  | 2 | 0      |   | GH  |
| 2:1 ENTEC Agromater 10 35  | 2 | 0      |   | GH  |
| Urea 8 60                  | 2 | 0      |   | GH  |
| Agromaster Tropical 8 35   | 2 | 0      |   | GH  |
| ENTECC 10 60               | 2 | 0      |   | GH  |
| Urea 10 60                 | 2 | 0      |   | GH  |
| Urea 10 35                 | 3 | 0      |   | H   |
| Agromaster Tropical 8 60   | 2 | 0      |   | GH  |
| Agromaster Tropical 10 60  | 1 | 0      | D | FGH |
| POC 8 35                   | 2 | 0      |   | GH  |
| POC 10 35                  | 2 | 0      |   | GH  |
| 1:2 ENTEC:Agromaster 10 60 | 2 | 0      |   | GH  |

Means that do not share a letter are significantly different.

## NH<sub>4</sub>-N

### Factor Information

| Factor    | Type  | Levels | Values                                                                            |
|-----------|-------|--------|-----------------------------------------------------------------------------------|
| Treatment | Fixed | 6      | 1:2 ENTEC:Agromaster, 2:1 ENTEC Agromater, Agromaster Tropical, ENTECC, POC, Urea |
| Zone      | Fixed | 6      | 0, 2, 4, 6, 8, 10                                                                 |
| Time      | Fixed | 3      | 10, 35, 60                                                                        |

## Ferralsol

### Analysis of Variance

| Source    | DF | Adj SS | Adj MS | F-Value | P-Value |
|-----------|----|--------|--------|---------|---------|
| Treatment | 5  | 39727  | 7945   | 58.96   | 0.000   |
| Zone      | 5  | 556432 | 111286 | 825.82  | 0.000   |

|                     |     |        |       |       |       |
|---------------------|-----|--------|-------|-------|-------|
| Time                | 2   | 25778  | 12889 | 95.64 | 0.000 |
| Treatment*Zone      | 25  | 60696  | 2428  | 18.02 | 0.000 |
| Treatment*Time      | 10  | 38631  | 3863  | 28.67 | 0.000 |
| Zone*Time           | 10  | 10691  | 1069  | 7.93  | 0.000 |
| Treatment*Zone*Time | 50  | 21200  | 424   | 3.15  | 0.000 |
| Error               | 120 | 16171  | 135   |       |       |
| Total               | 227 | 778922 |       |       |       |

## Model Summary

| S       | R-sq   | R-sq(adj) | R-sq(pred) |
|---------|--------|-----------|------------|
| 11.6086 | 97.92% | 96.07%    | 91.82%     |

## Tukey Pairwise Comparisons: Treatment Grouping Information Using the Tukey Method and 95% Confidence

| Treatment            | N  | Mean    | Grouping |
|----------------------|----|---------|----------|
| ENTEC                | 36 | 75.8528 | A        |
| Urea                 | 48 | 74.7861 | A        |
| 2:1 ENTEC Agromater  | 36 | 70.7333 | A B      |
| 1:2 ENTEC:Agromaster | 36 | 65.0417 | B        |
| POC                  | 36 | 52.4250 | C        |
| Agromaster Tropical  | 36 | 38.8056 | D        |

Means that do not share a letter are significantly different.

## Tukey Pairwise Comparisons: Zone Grouping Information Using the Tukey Method and 95% Confidence

| Zone | N  | Mean    | Grouping |
|------|----|---------|----------|
| 0    | 38 | 147.862 | A        |
| 2    | 38 | 104.036 | B        |
| 4    | 38 | 66.681  | C        |
| 6    | 38 | 34.543  | D        |
| 8    | 38 | 15.890  | E        |
| 10   | 38 | 8.633   | E        |

Means that do not share a letter are significantly different.

## Tukey Pairwise Comparisons: Time

## Grouping Information Using the Tukey Method and 95% Confidence

| Time | N  | Mean    | Grouping |
|------|----|---------|----------|
| 10   | 78 | 77.0407 | A        |
| 35   | 78 | 60.7898 | B        |
| 60   | 72 | 50.9917 | C        |

Means that do not share a letter are significantly different.

## Tukey Pairwise Comparisons: Treatment\*Zone\*Time Grouping Information Using the Tukey Method and 95% Confidence

| Treatment*Zone*Time       | N | Mean    | Grouping    |
|---------------------------|---|---------|-------------|
| 1:2 ENTEC:Agromaster 0 10 | 2 | 210.5   | A           |
| 1:2 ENTEC:Agromaster 0 35 | 2 | 190     | AB          |
| POC 0 10                  | 2 | 189.5   | AB          |
| 2:1 ENTEC Agromater 0 10  | 2 | 179.5   | AB          |
| ENTE C 0 10               | 2 | 178     | ABC         |
| Urea 2 10                 | 3 | 177.333 | AB          |
| 1:2 ENTEC:Agromaster 0 60 | 2 | 172.5   | ABCD        |
| ENTE C 2 10               | 2 | 172     | ABCD        |
| POC 0 35                  | 2 | 171.5   | ABCD        |
| Urea 0 10                 | 3 | 170.667 | ABCD        |
| 2:1 ENTEC Agromater 0 35  | 2 | 159     | ABCDE       |
| Agromaster Tropical 0 35  | 2 | 150.5   | BCDEF       |
| Agromaster Tropical 0 60  | 2 | 149     | BCDEFG      |
| 2:1 ENTEC Agromater 2 10  | 2 | 148     | BCDEFGH     |
| POC 0 60                  | 2 | 147.5   | BCDEFGH     |
| ENTE C 4 10               | 2 | 144     | BCDEFGHI    |
| Urea 4 10                 | 3 | 142.667 | BCDEFGH     |
| 1:2 ENTEC:Agromaster 2 10 | 2 | 127.5   | CDEFGHIJ    |
| 2:1 ENTEC Agromater 0 60  | 2 | 125.5   | DEFGHIJ     |
| 2:1 ENTEC Agromater 4 10  | 2 | 116     | EFGHIJK     |
| 1:2 ENTEC:Agromaster 2 35 | 2 | 112.5   | EFGHIJKL    |
| 2:1 ENTEC Agromater 2 35  | 2 | 111.5   | EFGHIJKLM   |
| Urea 0 35                 | 3 | 103     | GHIJKLMN    |
| ENTE C 0 35               | 2 | 102     | FGHIJKLMNO  |
| Urea 2 35                 | 3 | 101.667 | GHIJKLMN    |
| Urea 6 10                 | 3 | 100.033 | IJKLMN      |
| ENTE C 2 35               | 2 | 99.8    | FGHIJKLMNO  |
| POC 2 10                  | 2 | 99.5    | FGHIJKLMNO  |
| 1:2 ENTEC:Agromaster 2 60 | 2 | 99.45   | FGHIJKLMNO  |
| ENTE C 6 10               | 2 | 96.75   | HIJKLMNO    |
| Agromaster Tropical 0 10  | 2 | 96.3    | HIJKLMNOP   |
| 2:1 ENTEC Agromater 2 60  | 2 | 95.05   | IJKLMNOPQ   |
| Agromaster Tropical 2 60  | 2 | 93.4    | IJKLMNOPQR  |
| ENTE C 4 35               | 2 | 88.85   | JKLMNOPQRST |

|                           |   |        |                        |
|---------------------------|---|--------|------------------------|
| Urea 4 35                 | 3 | 87.833 | JKLMNOPQR T            |
| POC 2 35                  | 2 | 87.3   | JKLMNOPQRSTU           |
| POC 2 60                  | 2 | 85.5   | JKLMNOPQRSTUV          |
| ENTEC 0 60                | 2 | 84.85  | JKLMNOPQRSTUV          |
| Agromaster Tropical 2 35  | 2 | 81.8   | JKLMNOPQRSTUVW         |
| Urea 0 60                 | 2 | 81.7   | JKLMNOPQRSTUVW         |
| 2:1 ENTEC Agromater 4 35  | 2 | 80.25  | JKLMNOPQRSTUVW         |
| 1:2 ENTEC:Agromaster 4 10 | 2 | 78.5   | JKLMNOPQRSTUVWX        |
| ENTEC 2 60                | 2 | 76.2   | JKLMNOPQRSTUVWXY       |
| Urea 2 60                 | 2 | 70.4   | KLMNOPQRSTUVWXYZ       |
| 2:1 ENTEC Agromater 6 10  | 2 | 63.6   | LMNOPQRSTUVWXYZAA      |
| ENTEC 4 60                | 2 | 60.75  | LMNOPQRSTUVWXYZAAAB    |
| 1:2 ENTEC:Agromaster 4 35 | 2 | 60.3   | MNOPQRSTUVWXYZAAABAC   |
| ENTEC 6 35                | 2 | 57.95  | NOPQRSTUVWXYZAAABACAD  |
| 2:1 ENTEC Agromater 4 60  | 2 | 57.3   | NOPQRSTUVWXYZAAABACAD  |
| Urea 6 35                 | 3 | 55.433 | OPQRSTUVWXYZAAABAC     |
| Urea 4 60                 | 2 | 51.3   | OPQRSTUVWXYZAAABACADAE |
| 1:2 ENTEC:Agromaster 4 60 | 2 | 44.85  | PQRSTUVWXYZAAABACADAE  |
| Agromaster Tropical 4 60  | 2 | 43.95  | QRSTUVWXYZAAABACADAE   |
| Urea 8 10                 | 3 | 43.733 | S UVWXYZAAABACADAE     |
| POC 4 35                  | 2 | 42.2   | RSTUVWXYZAAABACADAE    |
| POC 4 10                  | 2 | 41.7   | RSTUVWXYZAAABACADAE    |
| ENTEC 8 10                | 2 | 40.65  | STUVWXYZAAABACADAE     |
| 2:1 ENTEC Agromater 6 35  | 2 | 38.95  | S UVWXYZAAABACADAE     |
| ENTEC 6 60                | 2 | 38.55  | S UVWXYZAAABACADAE     |
| Urea 8 35                 | 3 | 38.233 | VWXYZAAABACADAE        |
| ENTEC 8 35                | 2 | 36.6   | UVWXYZAAABACADAE       |
| POC 4 60                  | 2 | 35.8   | UVWXYZAAABACADAE       |
| Agromaster Tropical 2 10  | 2 | 33.75  | VWXYZAAABACADAE        |
| Urea 6 60                 | 2 | 32.1   | WXYZAAABACADAE         |
| 1:2 ENTEC:Agromaster 6 10 | 2 | 28.05  | XYZAAABACADAE          |
| 2:1 ENTEC Agromater 6 60  | 2 | 26.6   | YZAAABACADAE           |
| ENTEC 8 60                | 2 | 25     | YZAAABACADAE           |
| Urea 8 60                 | 2 | 24.85  | YZAAABACADAE           |
| Urea 10 35                | 3 | 24.367 | ZAAABACADAE            |
| ENTEC 10 35               | 2 | 24.35  | YZAAABACADAE           |
| Urea 10 10                | 3 | 21.533 | AAABACADAE             |
| Agromaster Tropical 4 35  | 2 | 21.2   | ZAAABACADAE            |
| ENTEC 10 10               | 2 | 20.15  | ZAAABACADAE            |
| 2:1 ENTEC Agromater 8 35  | 2 | 19.7   | ZAAABACADAE            |
| Urea 10 60                | 2 | 19.3   | ZAAABACADAE            |
| 2:1 ENTEC Agromater 8 10  | 2 | 18.95  | ZAAABACADAE            |
| ENTEC 10 60               | 2 | 18.9   | ZAAABACADAE            |
| Agromaster Tropical 6 60  | 2 | 16.8   | AAABACADAE             |
| 1:2 ENTEC:Agromaster 6 60 | 2 | 15.35  | AAABACADAE             |
| 1:2 ENTEC:Agromaster 6 35 | 2 | 13.6   | AAABACADAE             |

|                            |   |       |            |
|----------------------------|---|-------|------------|
| POC 6 60                   | 2 | 13.1  | AAABACADAE |
| 2:1 ENTEC Agromater 8 60   | 2 | 13    | AAABACADAE |
| POC 6 35                   | 2 | 12.15 | AAABACADAE |
| 2:1 ENTEC Agromater 10 10  | 2 | 9     | ABACADAE   |
| POC 6 10                   | 2 | 8.6   | ACADAE     |
| 2:1 ENTEC Agromater 10 35  | 2 | 7.7   | ADAE       |
| 1:2 ENTEC:Agromaster 8 10  | 2 | 6.85  | ADAE       |
| POC 8 60                   | 2 | 4.7   | AE         |
| 1:2 ENTEC:Agromaster 8 60  | 2 | 4.45  | AE         |
| 1:2 ENTEC:Agromaster 10 10 | 2 | 3.8   | AE         |
| Agromaster Tropical 6 35   | 2 | 3.7   | AE         |
| 2:1 ENTEC Agromater 10 60  | 2 | 3.6   | AE         |
| Agromaster Tropical 8 60   | 2 | 3.4   | AE         |
| Agromaster Tropical 4 10   | 2 | 2.8   | AE         |
| 1:2 ENTEC:Agromaster 8 35  | 2 | 2     | AE         |
| POC 8 35                   | 2 | 1.7   | AE         |
| POC 8 10                   | 2 | 1.55  | AE         |
| POC 10 10                  | 2 | 0.8   | AE         |
| 1:2 ENTEC:Agromaster 10 60 | 2 | 0.55  | AE         |
| Agromaster Tropical 10 10  | 2 | 0.55  | AE         |
| Agromaster Tropical 6 10   | 2 | 0.45  | AE         |
| Agromaster Tropical 8 35   | 2 | 0.45  | AE         |
| POC 10 60                  | 2 | 0.45  | AE         |
| Agromaster Tropical 10 35  | 2 | 0.25  | AE         |
| Agromaster Tropical 8 10   | 2 | 0.2   | AE         |
| POC 10 35                  | 2 | 0.1   | AE         |
| Agromaster Tropical 10 60  | 2 | 0     | AE         |
| 1:2 ENTEC:Agromaster 10 35 | 2 | 0     | AE         |

Means that do not share a letter are significantly different.

## Vertisol

### Analysis of Variance

| Source              | DF  | Adj SS  | Adj MS | F-Value | P-Value |
|---------------------|-----|---------|--------|---------|---------|
| Treatment           | 5   | 110702  | 22140  | 6.05    | 0.000   |
| Zone                | 5   | 3901116 | 780223 | 213.30  | 0.000   |
| Time                | 2   | 153283  | 76641  | 20.95   | 0.000   |
| Treatment*Zone      | 25  | 293736  | 11749  | 3.21    | 0.000   |
| Treatment*Time      | 10  | 167802  | 16780  | 4.59    | 0.000   |
| Zone*Time           | 10  | 243988  | 24399  | 6.67    | 0.000   |
| Treatment*Zone*Time | 50  | 270948  | 5419   | 1.48    | 0.043   |
| Error               | 118 | 431634  | 3658   |         |         |



Total 225 5838150

## Model Summary

| S       | R-sq   | R-sq(adj) | R-sq(pred) |
|---------|--------|-----------|------------|
| 60.4807 | 92.61% | 85.90%    | *          |

## Tukey Pairwise Comparisons: Treatment Grouping Information Using the Tukey Method and 95% Confidence

| Treatment            | N  | Mean    | Grouping |
|----------------------|----|---------|----------|
| ENTEC                | 36 | 161.139 | A        |
| 2:1 ENTEC Agromater  | 36 | 147.864 | A B      |
| Urea                 | 48 | 125.916 | A B C    |
| 1:2 ENTEC:Agromaster | 36 | 124.403 | A B C    |
| POC                  | 36 | 111.047 | B C      |
| Agromaster Tropical  | 34 | 90.300  | C        |

Means that do not share a letter are significantly different.

## Tukey Pairwise Comparisons: Zone Grouping Information Using the Tukey Method and 95% Confidence

| Zone | N  | Mean    | Grouping |
|------|----|---------|----------|
| 0    | 37 | 372.262 | A        |
| 2    | 38 | 230.687 | B        |
| 4    | 38 | 108.221 | C        |
| 6    | 38 | 35.894  | D        |
| 8    | 38 | 9.712   | D        |
| 10   | 37 | 3.892   | D        |

Means that do not share a letter are significantly different.

## Tukey Pairwise Comparisons: Time Grouping Information Using the Tukey Method and 95% Confidence

| Time | N  | Mean    | Grouping |
|------|----|---------|----------|
| 10   | 78 | 150.329 | A        |
| 35   | 78 | 140.818 | A        |
| 60   | 70 | 89.188  | B        |

Means that do not share a letter are significantly different.

## Tukey Pairwise Comparisons: Treatment\*Zone\*Time

### Grouping Information Using the Tukey Method and 95% Confidence

| Treatment*Zone*Time       | N | Mean    | Grouping            |
|---------------------------|---|---------|---------------------|
| POC 0 10                  | 2 | 645     | A                   |
| 1:2 ENTEC:Agromaster 0 35 | 2 | 583.5   | AB                  |
| Agromaster Tropical 0 35  | 2 | 494     | ABCD                |
| Urea 0 10                 | 3 | 475.333 | ABC                 |
| POC 0 35                  | 2 | 460     | ABCDE               |
| 1:2 ENTEC:Agromaster 0 10 | 2 | 455     | ABCDEF              |
| 2:1 ENTEC Agromater 0 10  | 2 | 439.5   | ABCDEFG             |
| 2:1 ENTEC Agromater 0 35  | 2 | 434.5   | ABCDEFGH            |
| Urea 2 10                 | 3 | 426     | ABCDEF              |
| ENTEC 0 35                | 2 | 407     | ABCDEFGHI           |
| ENTEC 2 35                | 2 | 366.5   | BCDEFGHIJ           |
| 2:1 ENTEC Agromater 2 10  | 2 | 355     | BCDEFGHIJK          |
| ENTEC 0 10                | 2 | 343     | BCDEFGHIJKL         |
| ENTEC 2 10                | 2 | 308     | CDEFGHIJKLMN        |
| 2:1 ENTEC Agromater 0 60  | 2 | 308     | CDEFGHIJKLMN        |
| Urea 0 35                 | 3 | 303.333 | CDEFGHIJKLM         |
| Agromaster Tropical 0 60  | 1 | 301     | BCDEFGHIJKLMNOPQRST |
| 2:1 ENTEC Agromater 2 35  | 2 | 279     | CDEFGHIJKLMN R      |
| ENTEC 0 60                | 2 | 275     | CDEFGHIJKLMN RST    |
| POC 0 60                  | 2 | 268     | CDEFGHIJKLMNO RST   |
| Agromaster Tropical 0 10  | 2 | 267     | CDEFGHIJKLMNO RST   |
| 1:2 ENTEC:Agromaster 2 35 | 2 | 258.5   | CDEFGHIJKLMNOP RST  |
| 1:2 ENTEC:Agromaster 2 10 | 2 | 256.5   | CDEFGHIJKLMNOP RST  |
| ENTEC 2 60                | 2 | 254.5   | CDEFGHIJKLMNOP RST  |
| Urea 4 10                 | 3 | 252     | DEFGHIJKLMN RS      |
| Urea 2 35                 | 3 | 235.667 | EFGHIJKLMNO RST     |
| 2:1 ENTEC Agromater 2 60  | 2 | 235.5   | CDEFGHIJKLMNOPQRST  |
| ENTEC 4 35                | 2 | 220     | EFGHIJKLMNOPQRST    |
| ENTEC 4 10                | 2 | 214     | EFGHIJKLMNOPQRST    |
| 1:2 ENTEC:Agromaster 2 60 | 2 | 212     | EFGHIJKLMNOPQRST    |
| POC 2 10                  | 2 | 198.5   | EFGHIJKLMNOPQRST    |
| 2:1 ENTEC Agromater 4 10  | 2 | 191.5   | EFGHIJKLMNOPQRST    |
| Agromaster Tropical 2 35  | 2 | 184.5   | FGHIJKLMNOPQRST     |
| Agromaster Tropical 2 60  | 2 | 170.5   | GHIJKLMNOPQRST      |
| ENTEC 4 60                | 2 | 164.5   | HIJKLMNOPQRST       |
| 1:2 ENTEC:Agromaster 0 60 | 2 | 147.05  | IJKLMNOPQRST        |
| 2:1 ENTEC Agromater 4 35  | 2 | 138.5   | IJKLMNOPQRST        |
| POC 2 35                  | 2 | 133.5   | JJKLMNOPQRST        |
| POC 2 60                  | 2 | 126     | JJKLMNOPQRST        |
| Urea 4 35                 | 3 | 117.933 | KLMNOPQRST          |
| 2:1 ENTEC Agromater 4 60  | 2 | 116.55  | JJKLMNOPQRST        |
| Urea 0 60                 | 2 | 94.5    | KLMNOPQRST          |

|                           |   |        |            |
|---------------------------|---|--------|------------|
| 1:2 ENTEC:Agromaster 4 35 | 2 | 93.75  | KLMNOPQRST |
| ENTEK 6 10                | 2 | 87     | KLMNOPQRST |
| Urea 6 10                 | 3 | 86.9   | MNOPQRST   |
| ENTEK 6 35                | 2 | 83.25  | LMNOPQRST  |
| Urea 2 60                 | 2 | 81.4   | LMNOPQRST  |
| 1:2 ENTEC:Agromaster 4 60 | 2 | 80.4   | LMNOPQRST  |
| 1:2 ENTEC:Agromaster 4 10 | 2 | 76.35  | LMNOPQRST  |
| ENTEK 6 60                | 2 | 72.3   | LMNOPQRST  |
| Agromaster Tropical 2 10  | 2 | 70.8   | MNOPQRST   |
| Urea 6 35                 | 3 | 63.8   | NOPQRST    |
| POC 4 35                  | 2 | 54.7   | NOPQRST    |
| Agromaster Tropical 4 60  | 2 | 53.75  | NOPQRST    |
| POC 4 60                  | 2 | 50.25  | NOPQRST    |
| Urea 4 60                 | 2 | 49.85  | NOPQRST    |
| ENTEK 8 10                | 2 | 48.15  | NOPQRST    |
| 2:1 ENTEK Agromater 6 10  | 2 | 45.55  | NOPQRST    |
| Agromaster Tropical 4 35  | 2 | 41.75  | NOPQRST    |
| 2:1 ENTEK Agromater 6 35  | 2 | 41.15  | NOPQRST    |
| 2:1 ENTEK Agromater 6 60  | 2 | 39.85  | NOPQRST    |
| Urea 8 10                 | 3 | 26.567 | OPQ        |
| ENTEK 10 10               | 2 | 25.7   | OPQRST     |
| 1:2 ENTEC:Agromaster 6 60 | 2 | 24.1   | OPQRST     |
| POC 4 10                  | 2 | 22.45  | OPQRST     |
| Urea 6 60                 | 2 | 21.65  | OPQRST     |
| 1:2 ENTEC:Agromaster 6 35 | 2 | 19.6   | OPQRST     |
| ENTEK 8 60                | 2 | 15.35  | OPQRST     |
| 1:2 ENTEC:Agromaster 6 10 | 2 | 14.9   | OPQRST     |
| POC 6 60                  | 2 | 13.75  | OPQRST     |
| 2:1 ENTEC Agromater 8 10  | 2 | 13.55  | OPQRST     |
| ENTEK 8 35                | 2 | 13.25  | OPQRST     |
| Urea 8 35                 | 3 | 12.7   | PQ         |
| Urea 10 10                | 3 | 11.933 | PQ         |
| POC 6 35                  | 2 | 10.3   | OPQRST     |
| Agromaster Tropical 4 10  | 2 | 9.75   | OPQRST     |
| Agromaster Tropical 6 60  | 2 | 7.65   | OPQ ST     |
| 2:1 ENTEC Agromater 8 60  | 2 | 7.65   | OPQ ST     |
| 2:1 ENTEC Agromater 10 10 | 2 | 6.9    | OPQ ST     |
| Agromaster Tropical 6 10  | 2 | 6.65   | OPQ ST     |
| Agromaster Tropical 8 10  | 2 | 6.2    | OPQ ST     |
| Agromaster Tropical 10 10 | 2 | 5.95   | OPQ ST     |
| Urea 8 60                 | 2 | 5.85   | OPQ ST     |
| 1:2 ENTEC:Agromaster 8 10 | 2 | 4.85   | OPQ T      |
| 2:1 ENTEC Agromater 8 35  | 2 | 4.85   | OPQ T      |
| POC 6 10                  | 2 | 4.45   | OPQ T      |
| 1:2 ENTEC:Agromaster 8 35 | 2 | 4.15   | OPQ        |
| POC 8 10                  | 2 | 4      | OPQ        |

|                               |   |       |          |
|-------------------------------|---|-------|----------|
| 1:2 ENTEC:Agromaster 8 60     | 2 | 3.9   | OPQ      |
| 1:2 ENTEC:Agromaster 10<br>10 | 2 | 3.85  | OPQ      |
| 2:1 ENTEC Agromater 10 60     | 2 | 3.3   | OPQ      |
| Agromaster Tropical 6 35      | 2 | 3.25  | OPQ      |
| POC 8 60                      | 2 | 3.05  | OPQ      |
| POC 10 10                     | 2 | 3.05  | OPQ      |
| ENTEK 10 35                   | 2 | 1.9   | OPQ      |
| Agromaster Tropical 10 35     | 2 | 1.9   | OPQ      |
| POC 10 60                     | 2 | 1.85  | OPQ      |
| ENTEK 10 60                   | 2 | 1.1   | OPQ      |
| 1:2 ENTEC:Agromaster 10<br>35 | 2 | 0.85  | OPQ      |
| 2:1 ENTEC Agromater 10 35     | 2 | 0.7   | OPQ      |
| Agromaster Tropical 8 35      | 2 | 0.6   | OPQ      |
| Urea 10 35                    | 3 | 0.567 | Q        |
| Urea 10 60                    | 2 | 0.5   | OPQ      |
| Agromaster Tropical 8 60      | 2 | 0.15  | OPQ      |
| Agromaster Tropical 10 60     | 1 | 0     | MNOPQRST |
| POC 8 35                      | 2 | 0     | OPQ      |
| POC 10 35                     | 2 | 0     | OPQ      |
| 1:2 ENTEC:Agromaster 10<br>60 | 2 | 0     | OPQ      |

Means that do not share a letter are significantly different.

## NO<sub>3</sub>-N

### Factor Information

| Factor    | Type  | Levels | Values                                                                           |
|-----------|-------|--------|----------------------------------------------------------------------------------|
| Treatment | Fixed | 6      | 1:2 ENTEC:Agromaster, 2:1 ENTEC Agromater, Agromaster Tropical, ENTEK, POC, Urea |
| Zone      | Fixed | 6      | 0, 2, 4, 6, 8, 10                                                                |
| Time      | Fixed | 3      | 10, 35, 60                                                                       |

## Ferralsol

### Analysis of Variance

| Source         | DF | Adj SS  | Adj MS  | F-Value | P-Value |
|----------------|----|---------|---------|---------|---------|
| Treatment      | 5  | 1818.5  | 363.7   | 114.03  | 0.000   |
| Zone           | 5  | 3804.1  | 760.8   | 238.55  | 0.000   |
| Time           | 2  | 39870.6 | 19935.3 | 6250.50 | 0.000   |
| Treatment*Zone | 25 | 7274.8  | 291.0   | 91.24   | 0.000   |
| Treatment*Time | 10 | 1167.6  | 116.8   | 36.61   | 0.000   |

|                     |     |         |       |        |       |
|---------------------|-----|---------|-------|--------|-------|
| Zone*Time           | 10  | 3886.2  | 388.6 | 121.85 | 0.000 |
| Treatment*Zone*Time | 50  | 2041.8  | 40.8  | 12.80  | 0.000 |
| Error               | 120 | 382.7   | 3.2   |        |       |
| Total               | 227 | 60543.6 |       |        |       |

## Model Summary

| S       | R-sq   | R-sq(adj) | R-sq(pred) |
|---------|--------|-----------|------------|
| 1.78589 | 99.37% | 98.80%    | 97.49%     |

## Tukey Pairwise Comparisons: Treatment Grouping Information Using the Tukey Method and 95% Confidence

| Treatment            | N  | Mean    | Grouping |
|----------------------|----|---------|----------|
| Agromaster Tropical  | 36 | 27.6667 | A        |
| POC                  | 36 | 25.6944 | B        |
| Urea                 | 48 | 21.4796 | C        |
| 1:2 ENTEC:Agromaster | 36 | 21.3192 | C D      |
| 2:1 ENTEC Agromater  | 36 | 20.2583 | D E      |
| ENTECC               | 36 | 20.0361 | E        |

Means that do not share a letter are significantly different.

## Tukey Pairwise Comparisons: Zone Grouping Information Using the Tukey Method and 95% Confidence

| Zone | N  | Mean    | Grouping |
|------|----|---------|----------|
| 2    | 38 | 27.8611 | A        |
| 0    | 38 | 25.9917 | B        |
| 4    | 38 | 25.3722 | B        |
| 6    | 38 | 22.2145 | C        |
| 8    | 38 | 18.7306 | D        |
| 10   | 38 | 16.2843 | E        |

Means that do not share a letter are significantly different.

## Tukey Pairwise Comparisons: Time Grouping Information Using the Tukey Method and 95% Confidence

| Time | N  | Mean    | Grouping |
|------|----|---------|----------|
| 60   | 72 | 38.2486 | A        |
| 35   | 78 | 24.3685 | B        |

10 78 5.6100 C

Means that do not share a letter are significantly different.

### Tukey Pairwise Comparisons: Treatment\*Zone\*Time Grouping Information Using the Tukey Method and 95% Confidence

| Treatment*Zone*Time          | N | Mean  | Grouping |
|------------------------------|---|-------|----------|
| Agromaster Tropical 2<br>60  | 2 | 75.15 | A        |
| Agromaster Tropical 0<br>60  | 2 | 71.7  | A        |
| POC 2 60                     | 2 | 61.55 | B        |
| Agromaster Tropical 2<br>35  | 2 | 58.1  | BC       |
| POC 0 60                     | 2 | 57.15 | BC       |
| Agromaster Tropical 0<br>35  | 2 | 56.2  | BC       |
| Agromaster Tropical 4<br>60  | 2 | 53.25 | CD       |
| 1:2 ENTEC:Agromaster<br>4 60 | 2 | 46.8  | DE       |
| POC 4 60                     | 2 | 46.7  | DE       |
| POC 2 35                     | 2 | 45.45 | DEF      |
| POC 0 35                     | 2 | 43.3  | EFG      |
| 2:1 ENTEC Agromater 4<br>60  | 2 | 42.25 | EFGH     |
| 1:2 ENTEC:Agromaster<br>2 60 | 2 | 41.65 | EFGH     |
| Urea 4 60                    | 2 | 41.3  | EFGHI    |
| Urea 2 60                    | 2 | 40.2  | EFGHIJ   |
| Urea 0 60                    | 2 | 38.65 | FGHIJK   |
| Agromaster Tropical 6<br>60  | 2 | 37.8  | FGHIJKL  |
| 2:1 ENTEC Agromater 6<br>60  | 2 | 37.65 | FGHIJKLM |
| 1:2 ENTEC:Agromaster<br>6 60 | 2 | 37.55 | FGHIJKLM |
| ENTEK 6 60                   | 2 | 37.55 | FGHIJKLM |
| ENTEK 4 60                   | 2 | 36.8  | GHIJKLMN |
| 2:1 ENTEC Agromater 2<br>60  | 2 | 36.05 | GHIJKLMN |
| Urea 6 60                    | 2 | 35.95 | GHIJKLMN |
| 1:2 ENTEC:Agromaster<br>0 60 | 2 | 35.05 | HIJKLMN  |
| POC 6 60                     | 2 | 34.95 | HIJKLMN  |
| 2:1 ENTEC Agromater 0<br>60  | 2 | 33.65 | IJKLMNOP |
| 1:2 ENTEC:Agromaster<br>8 60 | 2 | 33.2  | JKLMNOP  |

|                            |   |             |                         |
|----------------------------|---|-------------|-------------------------|
| ENTEC 2 60                 | 2 | 31.95       | KLMNOPQ                 |
| Agromaster Tropical 4 35   | 2 | 31.75       | KLMNOPQ                 |
| ENTEC 8 60                 | 2 | 31.2        | KLMNOPQR                |
| ENTEC 0 60                 | 2 | 31.2        | KLMNOPQR                |
| 2:1 ENTEC Agromater 8 60   | 2 | 30.55       | LMNOPQRS                |
| POC 4 35                   | 2 | 30.35       | LMNOPQRST               |
| 1:2 ENTEC:Agromaster 10 60 | 2 | 30.25       | LMNOPQRSTU              |
| POC 8 60                   | 2 | 29.8        | MNOPQRSTUV              |
| Urea 8 60                  | 2 | 29.25       | NOPQRSTUVW              |
| Urea 6 35                  | 3 | 27.4        | OPQRSTUVWX              |
| Urea 4 35                  | 3 | 27.133<br>3 | OPQRSTUVWXY             |
| ENTEC 10 60                | 2 | 26.8        | OPQRSTUVWXYZ            |
| POC 10 60                  | 2 | 26.75       | OPQRSTUVWXYZAA          |
| 2:1 ENTEC Agromater 10 60  | 2 | 26.65       | OPQRSTUVWXYZAAAB        |
| Agromaster Tropical 8 60   | 2 | 26.15       | OPQRSTUVWXYZAAABAC      |
| ENTEC 6 35                 | 2 | 25.7        | OPQRSTUVWXYZAAABAC      |
| Urea 10 60                 | 2 | 25.65       | PQRSTUVWXYZAAAABACAD    |
| Urea 2 35                  | 3 | 25.266<br>7 | QRSTUVWXYZAAABAC        |
| Urea 0 35                  | 3 | 24.166<br>7 | RSTUVWXYZAAAABACADAE    |
| ENTEC 4 35                 | 2 | 24.1        | QRSTUVWXYZAAAABACADAEAF |
| 2:1 ENTEC Agromater 6 35   | 2 | 23.35       | RSTUVWXYZAAAABACADAEAF  |
| 1:2 ENTEC:Agromaster 4 35  | 2 | 22.95       | STUVWXYZAAAABACADAEAF   |
| ENTEC 2 35                 | 2 | 22.45       | TUVWXYZAAAABACADAEAF    |
| 1:2 ENTEC:Agromaster 6 35  | 2 | 22.3        | UVWXYZAAAABACADAEAF     |
| 2:1 ENTEC Agromater 4 35   | 2 | 22.25       | VWXYZAAAABACADAEAF      |
| Urea 8 35                  | 3 | 22.233<br>3 | WXYZAAAABACADAEAF       |
| ENTEC 0 35                 | 2 | 21.65       | WXYZAAAABACADAEAF       |
| 2:1 ENTEC Agromater 2 35   | 2 | 21.5        | WXYZAAAABACADAEAF       |
| ENTEC 8 35                 | 2 | 21.05       | XYZAAAABACADAEAF        |
| 1:2 ENTEC:Agromaster 8 35  | 2 | 20.9        | XYZAAAABACADAEAF        |
| 2:1 ENTEC Agromater 0 35   | 2 | 20.85       | XYZAAAABACADAEAF        |

|                               |   |             |                       |
|-------------------------------|---|-------------|-----------------------|
| 1:2 ENTEC:Agromaster<br>10 35 | 2 | 20.05       | YZAAABACADAEAFAG      |
| Agromaster Tropical 6<br>35   | 2 | 19.15       | ZAAABACADAEAFAGA<br>H |
| Urea 10 35                    | 3 | 18.966<br>7 | ACADAEAFAGAH          |
| ENTEK 10 35                   | 2 | 18.8        | AAABACADAEAFAGA<br>H  |
| 1:2 ENTEC:Agromaster<br>2 35  | 2 | 18.75       | ABACADAEAFAGAH        |
| 2:1 ENTEC Agromater 8<br>35   | 2 | 18.5        | ACADAEAFAGAH          |
| POC 6 35                      | 2 | 18.5        | ACADAEAFAGAH          |
| Agromaster Tropical 10<br>60  | 2 | 18.2        | ACADAEAFAGAHAI        |
| 2:1 ENTEC Agromater<br>10 35  | 2 | 17.7        | ADAEAFAGAHAI<br>J     |
| POC 8 35                      | 2 | 17.1        | AEAFAGAHAIJA<br>K     |
| 1:2 ENTEC:Agromaster<br>0 35  | 2 | 16.5        | AFAGAHAIJAK<br>AL     |
| POC 10 35                     | 2 | 12.4        | AGAHAIJAKA<br>LAM     |
| Agromaster Tropical 8<br>35   | 2 | 11.8        | AHAIAJAKAL<br>AMAN    |
| ENTEK 8 10                    | 2 | 10.3        | AIAJAKALA<br>MANAO    |
| 1:2 ENTEC:Agromaster<br>6 10  | 2 | 10.295      | AIAJAKALA<br>MANAO    |
| 2:1 ENTEC Agromater 6<br>10   | 2 | 10.15       | AJAKALAM<br>ANAOAP    |
| Urea 8 10                     | 3 | 9.9667      | AKALAM<br>ANAO        |
| 1:2 ENTEC:Agromaster<br>4 10  | 2 | 9.95        | AJAKALAM<br>ANAOAP    |
| Urea 10 10                    | 3 | 9.8         | ALAMANAO              |
| ENTEK 10 10                   | 2 | 9.7         | AKALAMANAOAPAQ        |
| 2:1 ENTEC Agromater 8<br>10   | 2 | 9.2         | AKALAMANAOAPAQAR      |
| Agromaster Tropical 10<br>35  | 2 | 8.65        | ALAMANAOAPAQAR        |
| POC 2 10                      | 2 | 8.45        | AMANAOAPAQAR          |
| POC 4 10                      | 2 | 7.95        | AMANAOAPAQAR          |
| 2:1 ENTEC Agromater<br>10 10  | 2 | 7.65        | AMANAOAPAQAR          |
| Agromaster Tropical 2<br>10   | 2 | 7.45        | AMANAOAPAQAR          |
| POC 0 10                      | 2 | 7.1         | AMANAOAPAQAR          |
| 1:2 ENTEC:Agromaster<br>8 10  | 2 | 6.9         | AMANAOAPAQAR          |



|                               |   |        |              |
|-------------------------------|---|--------|--------------|
| 1:2 ENTEC:Agromaster<br>10 10 | 2 | 6.1    | AMANAOAPAQAR |
| ENTEK 6 10                    | 2 | 6.1    | AMANAOAPAQAR |
| POC 6 10                      | 2 | 5.65   | AMANAOAPAQAR |
| Urea 6 10                     | 3 | 5.5667 | AMANAOAPAQAR |
| Agromaster Tropical 4<br>10   | 2 | 5.05   | AMANAOAPAQAR |
| POC 8 10                      | 2 | 4.8    | AMANAOAPAQAR |
| Agromaster Tropical 0<br>10   | 2 | 4.65   | AMANAOAPAQAR |
| POC 10 10                     | 2 | 4.55   | AMANAOAPAQAR |
| Agromaster Tropical 10<br>10  | 2 | 4.45   | AMANAOAPAQAR |
| Agromaster Tropical 6<br>10   | 2 | 4.25   | ANAOAPAQAR   |
| Agromaster Tropical 8<br>10   | 2 | 4.25   | ANAOAPAQAR   |
| 2:1 ENTEC Agromater 4<br>10   | 2 | 3.7    | AOAPAQAR     |
| 1:2 ENTEC:Agromaster<br>2 10  | 2 | 2.75   | AOAPAQAR     |
| ENTEK 4 10                    | 2 | 2.25   | APAQAR       |
| Urea 4 10                     | 3 | 2.1667 | AR           |
| 1:2 ENTEC:Agromaster<br>0 10  | 2 | 1.8    | AQAR         |
| 2:1 ENTEC Agromater 2<br>10   | 2 | 1.65   | AR           |
| ENTEK 2 10                    | 2 | 1.6    | AR           |
| Urea 2 10                     | 3 | 1.5333 |              |
| ENTEK 0 10                    | 2 | 1.45   | AR           |
| Urea 0 10                     | 3 | 1.4333 |              |
| 2:1 ENTEC Agromater 0<br>10   | 2 | 1.35   | AR           |

Means that do not share a letter are significantly different.

## Vertisol

### Analysis of Variance

| Source         | DF | Adj SS | Adj MS  | F-Value | P-Value |
|----------------|----|--------|---------|---------|---------|
| Treatment      | 5  | 29729  | 5945.8  | 89.82   | 0.000   |
| Zone           | 5  | 12587  | 2517.5  | 38.03   | 0.000   |
| Time           | 2  | 88168  | 44084.2 | 665.96  | 0.000   |
| Treatment*Zone | 25 | 18951  | 758.0   | 11.45   | 0.000   |
| Treatment*Time | 10 | 16025  | 1602.5  | 24.21   | 0.000   |
| Zone*Time      | 10 | 7083   | 708.3   | 10.70   | 0.000   |

|                     |     |        |       |      |       |
|---------------------|-----|--------|-------|------|-------|
| Treatment*Zone*Time | 50  | 10081  | 201.6 | 3.05 | 0.000 |
| Error               | 118 | 7811   | 66.2  |      |       |
| Total               | 225 | 188566 |       |      |       |

## Model Summary

| S       | R-sq   | R-sq(adj) | R-sq(pred) |
|---------|--------|-----------|------------|
| 8.13613 | 95.86% | 92.10%    | *          |

## Tukey Pairwise Comparisons: Treatment Grouping Information Using the Tukey Method and 95% Confidence

| Treatment            | N  | Mean    | Grouping |
|----------------------|----|---------|----------|
| Urea                 | 48 | 44.7491 | A        |
| POC                  | 36 | 36.4889 | B        |
| Agromaster Tropical  | 34 | 33.1389 | B        |
| ENTEC                | 36 | 18.0500 | C        |
| 2:1 ENTEC Agromater  | 36 | 17.8056 | C        |
| 1:2 ENTEC:Agromaster | 36 | 15.0861 | C        |

Means that do not share a letter are significantly different.

## Tukey Pairwise Comparisons: Zone Grouping Information Using the Tukey Method and 95% Confidence

| Zone | N  | Mean    | Grouping |
|------|----|---------|----------|
| 0    | 37 | 36.5120 | A        |
| 2    | 38 | 35.8352 | A B      |
| 4    | 38 | 30.9019 | B C      |
| 6    | 38 | 25.7454 | C        |
| 8    | 38 | 20.2259 | D        |
| 10   | 37 | 16.0981 | D        |

Means that do not share a letter are significantly different.

## Tukey Pairwise Comparisons: Time Grouping Information Using the Tukey Method and 95% Confidence

| Time | N  | Mean    | Grouping |
|------|----|---------|----------|
| 60   | 70 | 50.3611 | A        |
| 35   | 78 | 30.8625 | B        |

Means that do not share a letter are significantly different.

### Tukey Pairwise Comparisons: Treatment\*Zone\*Time Grouping Information Using the Tukey Method and 95% Confidence

| Treatment*Zone*Time       | N | Mean   | Grouping                |
|---------------------------|---|--------|-------------------------|
| Urea 0 60                 | 2 | 115.5  | A                       |
| Urea 2 60                 | 2 | 108    | AB                      |
| POC 0 60                  | 2 | 99.8   | ABC                     |
| Agromaster Tropical 2 60  | 2 | 99.4   | ABC                     |
| Agromaster Tropical 0 60  | 1 | 99.2   | ABCD                    |
| POC 0 35                  | 2 | 93.5   | ABCD                    |
| Urea 4 60                 | 2 | 91.95  | ABCD                    |
| POC 2 60                  | 2 | 85.55  | ABCDE                   |
| Agromaster Tropical 2 35  | 2 | 78.7   | BCDEF                   |
| Urea 6 60                 | 2 | 76.65  | BCDEFG                  |
| Agromaster Tropical 0 35  | 2 | 68.2   | CDEFGHI                 |
| Urea 4 35                 | 3 | 66.567 | CDEFGH                  |
| Agromaster Tropical 4 60  | 2 | 65.7   | CDEFGHIJK               |
| POC 2 35                  | 2 | 64.5   | CDEFGHIJKL              |
| POC 4 60                  | 2 | 63.75  | CDEFGHIJKLM             |
| Urea 2 35                 | 3 | 63.6   | DEFGHIJ                 |
| Urea 8 60                 | 2 | 59.75  | DEFGHIJKLMN             |
| Urea 0 35                 | 3 | 56.767 | EFGHIJKLMN              |
| Urea 6 35                 | 3 | 51.067 | FGHIJKLMNO              |
| Urea 10 60                | 2 | 47     | FGHIJKLMNOP             |
| Agromaster Tropical 4 35  | 2 | 46.95  | FGHIJKLMNOPQ            |
| POC 4 35                  | 2 | 46.15  | FGHIJKLMNOPQR           |
| POC 6 60                  | 2 | 46.15  | FGHIJKLMNOPQR           |
| 2:1 ENTEC Agromater 4 60  | 2 | 42.4   | FGHIJKLMNOPQRS          |
| Agromaster Tropical 6 60  | 2 | 40.35  | GHIJKLMNOPQRST          |
| 2:1 ENTEC Agromater 6 60  | 2 | 40     | HIJKLMNOPQRSTU          |
| ENTEK 6 60                | 2 | 38.75  | HIJKLMNOPQRSTUV         |
| POC 8 60                  | 2 | 38.65  | HIJKLMNOPQRSTUV         |
| 1:2 ENTEC:Agromaster 4 60 | 2 | 37.9   | HIJKLMNOPQRSTUVW        |
| ENTEK 8 60                | 2 | 36.7   | HIJKLMNOPQRSTUVWX       |
| 2:1 ENTEC Agromater 2 60  | 2 | 36.45  | HIJKLMNOPQRSTUVWXY      |
| 2:1 ENTEC Agromater 8 60  | 2 | 35.65  | HIJKLMNOPQRSTUVWXYZ     |
| Urea 8 35                 | 3 | 35.333 | IJKLMNQRSTUV            |
| 1:2 ENTEC:Agromaster 2 60 | 2 | 34.75  | HIJKLMNQRSTUVWXYZAA     |
| POC 6 35                  | 2 | 33.8   | HIJKLMNQRSTUVWXYZAAAB   |
| 1:2 ENTEC:Agromaster 6 60 | 2 | 33.35  | HIJKLMNQRSTUVWXYZAAABAC |
| ENTEK 10 60               | 2 | 33.05  | IJKLMNQRSTUVWXYZAAABAC  |
| ENTEK 4 60                | 2 | 33.05  | IJKLMNQRSTUVWXYZAAABAC  |
| POC 10 60                 | 2 | 32.1   | IJKLMNQRSTUVWXYZAAABAC  |

|                            |   |        |                         |
|----------------------------|---|--------|-------------------------|
| 2:1 ENTEC Agromater 10 60  | 2 | 31.05  | JKLMNOPQRSTUVWXYZAAABAC |
| 2:1 ENTEC Agromater 0 60   | 2 | 29.4   | KLMNOPQRSTUVWXYZAAABAC  |
| 1:2 ENTEC:Agromaster 8 60  | 2 | 28.65  | LMNOPQRSTUVWXYZAAABAC   |
| 1:2 ENTEC:Agromaster 0 60  | 2 | 28     | MNOPQRSTUVWXYZAAABAC    |
| ENTEK 2 60                 | 2 | 27.95  | MNOPQRSTUVWXYZAAABAC    |
| ENTEK 6 35                 | 2 | 27.45  | MNOPQRSTUVWXYZAAABAC    |
| Agromaster Tropical 8 60   | 2 | 27.25  | NOPQRSTUVWXYZAAABAC     |
| ENTEK 8 35                 | 2 | 26.6   | NOPQRSTUVWXYZAAABAC     |
| ENTEK 0 60                 | 2 | 26.3   | NOPQRSTUVWXYZAAABAC     |
| Urea 10 35                 | 3 | 25.767 | OPQRSTUVWXYZAAABAC      |
| Agromaster Tropical 6 35   | 2 | 24.7   | NOPQRSTUVWXYZAAABAC     |
| 2:1 ENTEC Agromater 6 35   | 2 | 23.25  | OPQRSTUVWXYZAAABAC      |
| ENTEK 10 35                | 2 | 23.15  | OPQRSTUVWXYZAAABAC      |
| Agromaster Tropical 10 60  | 1 | 21.8   | JKLMNOPQRSTUVWXYZAAABAC |
| 2:1 ENTEC Agromater 8 35   | 2 | 21.55  | OPQRSTUVWXYZAAABAC      |
| 1:2 ENTEC:Agromaster 10 60 | 2 | 21.05  | OPQRSTUVWXYZAAABAC      |
| ENTEK 4 35                 | 2 | 19.65  | OPQRSTUVWXYZAAABAC      |
| 1:2 ENTEC:Agromaster 6 35  | 2 | 19.3   | OPQRSTUVWXYZAAABAC      |
| 2:1 ENTEC Agromater 4 35   | 2 | 17.85  | OPQRSTUVWXYZAAABAC      |
| POC 8 35                   | 2 | 17.5   | PQRSTUVWXYZAAABAC       |
| 1:2 ENTEC:Agromaster 4 35  | 2 | 16.4   | PQRSTUVWXYZAAABAC       |
| 2:1 ENTEC Agromater 10 35  | 2 | 15.3   | PQRSTUVWXYZAAABAC       |
| Agromaster Tropical 8 35   | 2 | 14.85  | PQRSTUVWXYZAAABAC       |
| ENTEK 0 35                 | 2 | 14.5   | PQRSTUVWXYZAAABAC       |
| ENTEK 2 35                 | 2 | 14.4   | PQRSTUVWXYZAAABAC       |
| 2:1 ENTEC Agromater 2 35   | 2 | 12.2   | PQRSTUVWXYZAAABAC       |
| 1:2 ENTEC:Agromaster 8 35  | 2 | 12.15  | PQRSTUVWXYZAAABAC       |
| POC 10 35                  | 2 | 11.4   | PQRSTUVWXYZAAABAC       |
| 1:2 ENTEC:Agromaster 2 35  | 2 | 10.55  | QRSTUVWXYZAAABAC        |
| 2:1 ENTEC Agromater 0 35   | 2 | 10.3   | RSTUVWXYZAAABAC         |
| Agromaster Tropical 10 35  | 2 | 9.15   | STUVWXYZAAABAC          |
| 1:2 ENTEC:Agromaster 10 35 | 2 | 9.1    | STUVWXYZAAABAC          |
| 1:2 ENTEC:Agromaster 0 35  | 2 | 8.85   | STUVWXYZAAABAC          |
| POC 2 10                   | 2 | 6.4    | STUVWXYZAAABAC          |
| POC 0 10                   | 2 | 4.8    | TUVWXYZAAABAC           |
| POC 4 10                   | 2 | 3.7    | UVWXYZAAABAC            |
| POC 8 10                   | 2 | 3.05   | VWXYZAAABAC             |
| POC 10 10                  | 2 | 3.05   | VWXYZAAABAC             |
| POC 6 10                   | 2 | 2.95   | VWXYZAAABAC             |
| 1:2 ENTEC:Agromaster 10 10 | 2 | 2.8    | VWXYZAAABAC             |
| 1:2 ENTEC:Agromaster 8 10  | 2 | 2.65   | VWXYZAAABAC             |
| 1:2 ENTEC:Agromaster 6 10  | 2 | 2.35   | VWXYZAAABAC             |
| 1:2 ENTEC:Agromaster 4 10  | 2 | 1.95   | WXYZAAABAC              |
| Urea 4 10                  | 3 | 1.867  | AAABAC                  |

|                           |   |       |            |
|---------------------------|---|-------|------------|
| Urea 6 10                 | 3 | 1.7   | AAABAC     |
| 2:1 ENTEC Agromater 10 10 | 2 | 1.5   | WXYZAAABAC |
| Urea 8 10                 | 3 | 1.433 | ABAC       |
| Urea 10 10                | 3 | 1.4   | ABAC       |
| 2:1 ENTEC Agromater 8 10  | 2 | 1.25  | XYZAAABAC  |
| ENTEK 10 10               | 2 | 1.1   | XYZAAABAC  |
| ENTEK 8 10                | 2 | 1.05  | XYZAAABAC  |
| 1:2 ENTEC:Agromaster 2 10 | 2 | 1.05  | XYZAAABAC  |
| 2:1 ENTEC Agromater 6 10  | 2 | 0.9   | XYZAAABAC  |
| 2:1 ENTEC Agromater 2 10  | 2 | 0.7   | XYZAAABAC  |
| ENTEK 6 10                | 2 | 0.7   | XYZAAABAC  |
| 1:2 ENTEC:Agromaster 0 10 | 2 | 0.7   | XYZAAABAC  |
| Urea 2 10                 | 3 | 0.633 | ABAC       |
| Urea 0 10                 | 3 | 0.5   | AC         |
| 2:1 ENTEC Agromater 0 10  | 2 | 0.45  | XYZAAABAC  |
| 2:1 ENTEC Agromater 4 10  | 2 | 0.3   | XYZAAABAC  |
| Agromaster Tropical 0 10  | 2 | 0.25  | YZAAABAC   |
| ENTEK 2 10                | 2 | 0.2   | YZAAABAC   |
| ENTEK 0 10                | 2 | 0.2   | YZAAABAC   |
| ENTEK 4 10                | 2 | 0.1   | YZAAABAC   |
| Agromaster Tropical 2 10  | 2 | 0     | ZAAABAC    |
| Agromaster Tropical 4 10  | 2 | 0     | ZAAABAC    |
| Agromaster Tropical 8 10  | 2 | 0     | ZAAABAC    |
| Agromaster Tropical 6 10  | 2 | 0     | ZAAABAC    |
| Agromaster Tropical 10 10 | 2 | 0     | ZAAABAC    |

Means that do not share a letter are significantly different.

## N retained in PCU granules

### Factor Information

| Factor    | Type  | Levels | Values                     |
|-----------|-------|--------|----------------------------|
| Treatment | Fixed | 4      | 1:2 E:A, 2:1 E:A, PCU, POC |
| Time      | Fixed | 3      | 10, 35, 60                 |

## Ferralsol

### Analysis of Variance

| Source    | DF | Adj SS | Adj MS | F-Value | P-Value |
|-----------|----|--------|--------|---------|---------|
| Treatment | 3  | 1630.3 | 543.4  | 9.70    | 0.002   |

|                |    |         |         |        |       |
|----------------|----|---------|---------|--------|-------|
| Time           | 2  | 34464.2 | 17232.1 | 307.46 | 0.000 |
| Treatment*Time | 6  | 1325.7  | 220.9   | 3.94   | 0.021 |
| Error          | 12 | 672.6   | 56.0    |        |       |
| Total          | 23 | 38092.7 |         |        |       |

## Model Summary

| S       | R-sq   | R-sq(adj) | R-sq(pred) |
|---------|--------|-----------|------------|
| 7.48643 | 98.23% | 96.62%    | 92.94%     |

## Tukey Pairwise Comparisons: Treatment Grouping Information Using the Tukey Method and 95% Confidence

| Treatment | N | Mean    | Grouping |
|-----------|---|---------|----------|
| 1:2 E:A   | 6 | 79.4842 | A        |
| PCU       | 6 | 61.3021 | B        |
| 2:1 E:A   | 6 | 60.8544 | B        |
| POC       | 6 | 59.4017 | B        |

Means that do not share a letter are significantly different.

## Tukey Pairwise Comparisons: Time Grouping Information Using the Tukey Method and 95% Confidence

| Time | N | Mean    | Grouping |
|------|---|---------|----------|
| 10   | 8 | 117.424 | A        |
| 35   | 8 | 49.819  | B        |
| 60   | 8 | 28.538  | C        |

Means that do not share a letter are significantly different.

## Tukey Pairwise Comparisons: Treatment\*Time Grouping Information Using the Tukey Method and 95% Confidence

| Treatment*Time | N | Mean    | Grouping |
|----------------|---|---------|----------|
| 1:2 E:A 10     | 2 | 146.343 | A        |
| PCU 10         | 2 | 112.993 | B        |
| 2:1 E:A 10     | 2 | 105.915 | B        |
| POC 10         | 2 | 104.446 | B        |
| 1:2 E:A 35     | 2 | 58.024  | C        |
| POC 35         | 2 | 51.962  | C D      |
| PCU 35         | 2 | 48.468  | C D E    |

|            |   |        |   |   |   |
|------------|---|--------|---|---|---|
| 2:1 E:A 35 | 2 | 40.821 | C | D | E |
| 2:1 E:A 60 | 2 | 35.827 | C | D | E |
| 1:2 E:A 60 | 2 | 34.086 | C | D | E |
| PCU 60     | 2 | 22.444 |   | D | E |
| POC 60     | 2 | 21.797 |   |   | E |

Means that do not share a letter are significantly different.

## Vertisol

### Analysis of Variance

| Source             | DF | Adj SS  | Adj MS  | F-Value | P-Value |
|--------------------|----|---------|---------|---------|---------|
| Treatment_D        | 3  | 1331.1  | 443.71  | 1.18    | 0.358   |
| Time_D             | 2  | 16337.0 | 8168.50 | 21.72   | 0.000   |
| Treatment_D*Time_D | 6  | 568.1   | 94.68   | 0.25    | 0.949   |
| Error              | 12 | 4513.8  | 376.15  |         |         |
| Total              | 23 | 22750.0 |         |         |         |

### Model Summary

| S       | R-sq   | R-sq(adj) | R-sq(pred) |
|---------|--------|-----------|------------|
| 19.3947 | 80.16% | 61.97%    | 20.64%     |

### Tukey Pairwise Comparisons: Treatment Grouping Information Using the Tukey Method and 95% Confidence

| Treatment | N | Mean    | Grouping |
|-----------|---|---------|----------|
| 1:2 E:A   | 6 | 72.7023 | A        |
| 2:1 E:A   | 6 | 72.5731 | A        |
| POC       | 6 | 59.0371 | A        |
| PCU       | 6 | 56.6425 | A        |

Means that do not share a letter are significantly different.

### Tukey Pairwise Comparisons: Time Grouping Information Using the Tukey Method and 95% Confidence

| Time_D | N | Mean    | Grouping |
|--------|---|---------|----------|
| 10     | 8 | 96.8395 | A        |

|    |   |         |   |
|----|---|---------|---|
| 35 | 8 | 65.9339 | B |
| 60 | 8 | 32.9427 | C |

Means that do not share a letter are significantly different.

## Tukey Pairwise Comparisons: Treatment\*Time Grouping Information Using the Tukey Method and 95% Confidence

| Treatment_D*Time_D | N | Mean    | Grouping |
|--------------------|---|---------|----------|
| 1:2 E:A 10         | 2 | 107.278 | A        |
| 2:1 E:A 10         | 2 | 102.471 | A        |
| POC 10             | 2 | 96.780  | A B      |
| PCU 10             | 2 | 80.829  | A B      |
| 2:1 E:A 35         | 2 | 79.873  | A B      |
| 1:2 E:A 35         | 2 | 71.864  | A B      |
| POC 35             | 2 | 56.479  | A B      |
| PCU 35             | 2 | 55.519  | A B      |
| 1:2 E:A 60         | 2 | 38.964  | A B      |
| 2:1 E:A 60         | 2 | 35.374  | A B      |
| PCU 60             | 2 | 33.580  | A B      |
| POC 60             | 2 | 23.852  | B        |

Means that do not share a letter are significantly different.

## pH

### Factor Information

| Factor    | Type  | Levels | Values                                                                           |
|-----------|-------|--------|----------------------------------------------------------------------------------|
| Treatment | Fixed | 6      | 1:2 ENTEC:Agromaster, 2:1 ENTEC Agromater, Agromaster Tropical, ENTEC, POC, Urea |
| Zone      | Fixed | 6      | 0, 2, 4, 6, 8, 10                                                                |
| Time      | Fixed | 3      | 10, 35, 60                                                                       |

## Ferralsol

### Analysis of Variance

| Source    | DF | Adj SS | Adj MS | F-Value | P-Value |
|-----------|----|--------|--------|---------|---------|
| Treatment | 5  | 36.833 | 7.3666 | 87.20   | 0.000   |



|                     |     |         |         |        |       |
|---------------------|-----|---------|---------|--------|-------|
| Zone                | 5   | 320.557 | 64.1115 | 758.87 | 0.000 |
| Time                | 2   | 67.360  | 33.6798 | 398.66 | 0.000 |
| Treatment*Zone      | 25  | 53.827  | 2.1531  | 25.49  | 0.000 |
| Treatment*Time      | 10  | 9.111   | 0.9111  | 10.78  | 0.000 |
| Zone*Time           | 10  | 12.700  | 1.2700  | 15.03  | 0.000 |
| Treatment*Zone*Time | 50  | 7.281   | 0.1456  | 1.72   | 0.009 |
| Error               | 119 | 10.053  | 0.0845  |        |       |
| Total               | 226 | 526.744 |         |        |       |

## Model Summary

| S        | R-sq   | R-sq(adj) | R-sq(pred) |
|----------|--------|-----------|------------|
| 0.290660 | 98.09% | 96.38%    | *          |

## Tukey Pairwise Comparisons: Treatment Grouping Information Using the Tukey Method and 95% Confidence

| Treatment            | N  | Mean    | Grouping |
|----------------------|----|---------|----------|
| ENTEC                | 36 | 7.24611 | A        |
| Urea                 | 48 | 7.11444 | A B      |
| 2:1 ENTEC Agromater  | 35 | 7.02278 | B        |
| 1:2 ENTEC:Agromaster | 36 | 6.68278 | C        |
| POC                  | 36 | 6.41028 | D        |
| Agromaster Tropical  | 36 | 6.10167 | E        |

Means that do not share a letter are significantly different.

## Tukey Pairwise Comparisons: Zone Grouping Information Using the Tukey Method and 95% Confidence

| Zone | N  | Mean    | Grouping |
|------|----|---------|----------|
| 0    | 37 | 8.49491 | A        |
| 2    | 38 | 8.03907 | B        |
| 4    | 38 | 7.10343 | C        |
| 6    | 38 | 6.05204 | D        |
| 8    | 38 | 5.52352 | E        |
| 10   | 38 | 5.36509 | E        |

Means that do not share a letter are significantly different.

## Tukey Pairwise Comparisons: Time

## Grouping Information Using the Tukey Method and 95% Confidence

| Time | N  | Mean    | Grouping |
|------|----|---------|----------|
| 10   | 78 | 7.44620 | A        |
| 35   | 78 | 6.75407 | B        |
| 60   | 71 | 6.08875 | C        |

Means that do not share a letter are significantly different.

## Tukey Pairwise Comparisons: Treatment\*Zone\*Time

### Grouping Information Using the Tukey Method and 95% Confidence

| Treatment*Zone*Time       | N | Mean    | Grouping      |
|---------------------------|---|---------|---------------|
| 1:2 ENTEC:Agromaster 0 60 | 2 | 9.325   | A             |
| 1:2 ENTEC:Agromaster 0 35 | 2 | 8.86    | AB            |
| POC 0 10                  | 2 | 8.825   | AB            |
| 1:2 ENTEC:Agromaster 0 10 | 2 | 8.825   | AB            |
| Urea 0 10                 | 3 | 8.80667 | AB            |
| POC 0 60                  | 2 | 8.77    | ABCD          |
| ENTEC 0 10                | 2 | 8.77    | ABCD          |
| 2:1 ENTEC Agromater 0 10  | 2 | 8.745   | ABCD          |
| 2:1 ENTEC Agromater 0 35  | 2 | 8.73    | ABCD          |
| Agromaster Tropical 0 10  | 2 | 8.725   | ABCDE         |
| ENTEC 2 10                | 2 | 8.715   | ABCDE         |
| Urea 2 10                 | 3 | 8.7     | AB D          |
| ENTEC 4 10                | 2 | 8.665   | ABCDE         |
| POC 0 35                  | 2 | 8.655   | ABCDE         |
| 2:1 ENTEC Agromater 2 10  | 2 | 8.655   | ABCDE         |
| Urea 4 10                 | 3 | 8.65    | ABCD          |
| Agromaster Tropical 0 60  | 2 | 8.625   | ABCDE         |
| 1:2 ENTEC:Agromaster 2 10 | 2 | 8.595   | ABCDE         |
| 2:1 ENTEC Agromater 4 10  | 2 | 8.565   | ABCDE         |
| ENTEC 6 10                | 2 | 8.545   | ABCDE         |
| 1:2 ENTEC:Agromaster 2 35 | 2 | 8.535   | ABCDE         |
| Urea 6 10                 | 3 | 8.49    | ABCDE         |
| POC 2 10                  | 2 | 8.455   | ABCDEF        |
| Agromaster Tropical 0 35  | 2 | 8.45    | ABCDEFG       |
| 2:1 ENTEC Agromater 2 35  | 2 | 8.39    | ABCDEFGH      |
| 2:1 ENTEC Agromater 0 60  | 1 | 8.34    | ABCDEFGHIJKLM |
| 1:2 ENTEC:Agromaster 2 60 | 2 | 8.335   | ABCDEFGH      |
| Urea 0 35                 | 3 | 8.32667 | ABCDEFGH      |
| 1:2 ENTEC:Agromaster 4 10 | 2 | 8.28    | ABCDEFGHI     |
| ENTEC 2 35                | 2 | 8.245   | ABCDEFGHIJ    |
| Urea 2 35                 | 3 | 8.24333 | ABCDEFGH      |
| ENTEC 0 35                | 2 | 8.24    | ABCDEFGHIJK   |
| 2:1 ENTEC Agromater 2 60  | 2 | 8.23    | ABCDEFGHIJK   |
| 2:1 ENTEC Agromater 4 35  | 2 | 8.165   | ABCDEFGHIJK   |

|                            |   |         |                       |
|----------------------------|---|---------|-----------------------|
| ENTEC 4 35                 | 2 | 8.16    | ABCDEFGHIJK M         |
| 2:1 ENTEC Agromater 6 10   | 2 | 8.095   | ABCDEFGHIJK M         |
| Urea 4 35                  | 3 | 8.05667 | BCDEFGHIJK            |
| POC 2 35                   | 2 | 7.82    | BCDEFGHIJKLMN         |
| ENTEC 2 60                 | 2 | 7.8     | BCDEFGHIJKLMNO        |
| 1:2 ENTEC:Agromaster 4 35  | 2 | 7.675   | BCDEFGHIJKLMNOP       |
| Urea 8 10                  | 3 | 7.59667 | C EFGHIJKLMNOP        |
| Agromaster Tropical 2 10   | 2 | 7.525   | CDEFGHIJKLMNO PQ      |
| ENTEC 8 10                 | 2 | 7.5     | C EFGHIJKLMNO PQ      |
| POC 2 60                   | 2 | 7.43    | EFGHIJKLMNO PQR       |
| Urea 2 60                  | 2 | 7.22    | FGHIJKLMNO PQRS       |
| ENTEC 0 60                 | 2 | 7.17    | FGHIJKLMNO PQRST      |
| POC 4 10                   | 2 | 7.155   | GHIJKLMNO PQRST       |
| ENTEC 4 60                 | 2 | 7.145   | HIJKLMNO PQRST        |
| ENTEC 6 35                 | 2 | 7.02    | IJKLMNO PQRSTU        |
| 2:1 ENTEC Agromater 4 60   | 2 | 6.975   | JKLMNO PQRSTUV        |
| Agromaster Tropical 2 60   | 2 | 6.945   | KLMNO PQRSTUVW        |
| Urea 6 35                  | 3 | 6.86667 | L NOPQRSTUV           |
| Agromaster Tropical 2 35   | 2 | 6.865   | LMNO PQRSTUVWX        |
| Urea 0 60                  | 2 | 6.72    | NOPQRSTUVWXY          |
| 1:2 ENTEC:Agromaster 6 10  | 2 | 6.57    | NOPQRSTUVWXYZ         |
| Urea 4 60                  | 2 | 6.51    | OPQRSTUVWXYZ          |
| ENTEC 10 10                | 2 | 6.435   | PQRSTUVWXYZAA         |
| 1:2 ENTEC:Agromaster 4 60  | 2 | 6.34    | QRSTUVWXYZAAAB        |
| Urea 10 10                 | 3 | 6.34    | QRSTUVWXYZAA          |
| 2:1 ENTEC Agromater 6 35   | 2 | 6.31    | QRSTUVWXYZAAABAC      |
| POC 4 35                   | 2 | 6.295   | QRSTUVWXYZAAABAC      |
| 2:1 ENTEC Agromater 8 10   | 2 | 6.245   | QRSTUVWXYZAAABAC      |
| ENTEC 8 35                 | 2 | 6.185   | RSTUVWXYZAAABACAD     |
| Urea 8 35                  | 3 | 6.06667 | STUVWXYZAAABACAD      |
| 2:1 ENTEC Agromater 10 10  | 2 | 5.985   | STUVWXYZAAABACADAE    |
| POC 6 10                   | 2 | 5.935   | STUVWXYZAAABACADAE    |
| ENTEC 6 60                 | 2 | 5.91    | TUVWXYZAAABACADAE     |
| Agromaster Tropical 4 10   | 2 | 5.91    | TUVWXYZAAABACADAE     |
| ENTEC 10 35                | 2 | 5.815   | UVWXYZAAABACADAEAF    |
| Agromaster Tropical 6 10   | 2 | 5.79    | UVWXYZAAABACADAEAF    |
| Urea 10 35                 | 3 | 5.77667 | WXYZAAABACADAE        |
| 1:2 ENTEC:Agromaster 8 10  | 2 | 5.775   | UVWXYZAAABACADAEAFAG  |
| POC 8 10                   | 2 | 5.73    | UVWXYZAAABACADAEAFAG  |
| Agromaster Tropical 8 10   | 2 | 5.69    | VWXYZAAABACADAEAFAGAH |
| 2:1 ENTEC Agromater 8 35   | 2 | 5.675   | WXYZAAABACADAEAFAGAH  |
| POC 10 10                  | 2 | 5.61    | XYZAAABACADAEAFAGAHAI |
| Agromaster Tropical 10 10  | 2 | 5.585   | XYZAAABACADAEAFAGAHAI |
| 1:2 ENTEC:Agromaster 10 10 | 2 | 5.58    | XYZAAABACADAEAFAGAHAI |
| POC 6 35                   | 2 | 5.485   | YZAAABACADAEAFAGAHAIJ |

|                            |   |       |                      |
|----------------------------|---|-------|----------------------|
| Urea 6 60                  | 2 | 5.395 | ZAAABACADAEAFAGAHIAJ |
| POC 4 60                   | 2 | 5.295 | ZAAABACADAEAFAGAHIAJ |
| 2:1 ENTEC Agromater 10 35  | 2 | 5.28  | ZAAABACADAEAFAGAHIAJ |
| Agromaster Tropical 10 35  | 2 | 5.28  | ZAAABACADAEAFAGAHIAJ |
| 1:2 ENTEC:Agromaster 6 35  | 2 | 5.205 | AAABACADAEAFAGAHIAJ  |
| POC 10 35                  | 2 | 5.2   | AAABACADAEAFAGAHIAJ  |
| Urea 8 60                  | 2 | 5.195 | AAABACADAEAFAGAHIAJ  |
| Agromaster Tropical 10 60  | 2 | 5.195 | AAABACADAEAFAGAHIAJ  |
| Agromaster Tropical 8 35   | 2 | 5.135 | ABACADAEAFAGAHIAJ    |
| Urea 10 60                 | 2 | 5.1   | ABACADAEAFAGAHIAJ    |
| ENTEC 8 60                 | 2 | 5.09  | ABACADAEAFAGAHIAJ    |
| Agromaster Tropical 4 60   | 2 | 5.075 | ABACADAEAFAGAHIAJ    |
| POC 8 35                   | 2 | 5.04  | ACADAEAFAGAHIAJ      |
| 2:1 ENTEC Agromater 6 60   | 2 | 5.025 | ACADAEAFAGAHIAJ      |
| ENTEC 10 60                | 2 | 5.02  | ACADAEAFAGAHIAJ      |
| Agromaster Tropical 4 35   | 2 | 4.945 | ADAEAFAGAHIAJ        |
| Agromaster Tropical 6 35   | 2 | 4.83  | AEAFAGAHIAJ          |
| 1:2 ENTEC:Agromaster 10 35 | 2 | 4.73  | AEAFAGAHIAJ          |
| POC 10 60                  | 2 | 4.72  | AEAFAGAHIAJ          |
| Agromaster Tropical 8 60   | 2 | 4.7   | AEAFAGAHIAJ          |
| 1:2 ENTEC:Agromaster 8 35  | 2 | 4.59  | AFAGAHIAJ            |
| 2:1 ENTEC Agromater 8 60   | 2 | 4.57  | AFAGAHIAJ            |
| Agromaster Tropical 6 60   | 2 | 4.56  | AFAGAHIAJ            |
| POC 6 60                   | 2 | 4.545 | AFAGAHIAJ            |
| 1:2 ENTEC:Agromaster 10 60 | 2 | 4.49  | AGAHIAJ              |
| 2:1 ENTEC Agromater 10 60  | 2 | 4.43  | AHIAJ                |
| POC 8 60                   | 2 | 4.42  | AHIAJ                |
| 1:2 ENTEC:Agromaster 6 60  | 2 | 4.36  | AIAJ                 |
| 1:2 ENTEC:Agromaster 8 60  | 2 | 4.22  | AJ                   |

Means that do not share a letter are significantly different.

## Vertisol

### Analysis of Variance

| Source         | DF | Adj SS | Adj MS  | F-Value | P-Value |
|----------------|----|--------|---------|---------|---------|
| Treatment      | 5  | 23.14  | 4.6285  | 29.88   | 0.000   |
| Zone           | 5  | 240.56 | 48.1111 | 310.54  | 0.000   |
| Time           | 2  | 68.64  | 34.3218 | 221.54  | 0.000   |
| Treatment*Zone | 25 | 41.42  | 1.6567  | 10.69   | 0.000   |

|                     |     |        |        |      |       |
|---------------------|-----|--------|--------|------|-------|
| Treatment*Time      | 10  | 12.64  | 1.2637 | 8.16 | 0.000 |
| Zone*Time           | 10  | 13.08  | 1.3084 | 8.45 | 0.000 |
| Treatment*Zone*Time | 50  | 17.30  | 0.3460 | 2.23 | 0.000 |
| Error               | 117 | 18.13  | 0.1549 |      |       |
| Total               | 224 | 449.25 |        |      |       |

## Model Summary

| S        | R-sq   | R-sq(adj) | R-sq(pred) |
|----------|--------|-----------|------------|
| 0.393606 | 95.97% | 92.28%    | *          |

## Tukey Pairwise Comparisons: Treatment Grouping Information Using the Tukey Method and 95% Confidence

| Treatment            | N  | Mean    | Grouping |
|----------------------|----|---------|----------|
| ENTEC                | 36 | 7.55889 | A        |
| 2:1 ENTEC Agromater  | 36 | 7.40417 | A B      |
| 1:2 ENTEC:Agromaster | 35 | 7.15222 | B        |
| Urea                 | 48 | 6.83111 | C        |
| Agromaster Tropical  | 34 | 6.78639 | C        |
| POC                  | 36 | 6.69556 | C        |

Means that do not share a letter are significantly different.

## Tukey Pairwise Comparisons: Zone Grouping Information Using the Tukey Method and 95% Confidence

| Zone | N  | Mean    | Grouping |
|------|----|---------|----------|
| 0    | 36 | 8.80778 | A        |
| 2    | 38 | 8.15204 | B        |
| 4    | 38 | 7.04648 | C        |
| 10   | 37 | 6.18926 | D        |
| 6    | 38 | 6.17231 | D        |
| 8    | 38 | 6.06046 | D        |

Means that do not share a letter are significantly different.

## Tukey Pairwise Comparisons: Time Grouping Information Using the Tukey Method and 95% Confidence

| Time | N  | Mean    | Grouping |
|------|----|---------|----------|
| 10   | 78 | 7.82634 | A        |
| 35   | 77 | 6.89824 | B        |
| 60   | 70 | 6.48958 | C        |

Means that do not share a letter are significantly different.

## Tukey Pairwise Comparisons: Treatment\*Zone\*Time Grouping Information Using the Tukey Method and 95% Confidence

| Treatment*Zone*Time       | N | Mean    | Grouping        |
|---------------------------|---|---------|-----------------|
| 1:2 ENTEC:Agromaster 0 60 | 2 | 9.19    | A               |
| 2:1 ENTEC Agromater 0 60  | 2 | 9.15    | AB              |
| 1:2 ENTEC:Agromaster 0 35 | 1 | 9.15    | ABCDEFGF        |
| POC 0 10                  | 2 | 9.135   | AB              |
| 1:2 ENTEC:Agromaster 0 10 | 2 | 9.07    | ABC             |
| Agromaster Tropical 0 10  | 2 | 9.05    | ABC             |
| 2:1 ENTEC Agromater 0 35  | 2 | 9.04    | ABC             |
| 2:1 ENTEC Agromater 0 10  | 2 | 9.035   | ABC             |
| Agromaster Tropical 0 35  | 2 | 9.01    | ABC             |
| Urea 0 10                 | 3 | 8.96667 | AB              |
| ENTE C 0 10               | 2 | 8.945   | ABC             |
| Urea 2 10                 | 3 | 8.88667 | ABC             |
| 2:1 ENTEC Agromater 2 60  | 2 | 8.88    | ABCD            |
| ENTE C 0 35               | 2 | 8.84    | ABCDE           |
| ENTE C 2 10               | 2 | 8.84    | ABCDE           |
| 1:2 ENTEC:Agromaster 2 10 | 2 | 8.83    | ABCDE           |
| 2:1 ENTEC Agromater 2 10  | 2 | 8.82    | ABCDE           |
| ENTE C 2 35               | 2 | 8.815   | ABCDE           |
| 2:1 ENTEC Agromater 2 35  | 2 | 8.805   | ABCDE           |
| ENTE C 0 60               | 2 | 8.78    | ABCDE           |
| 1:2 ENTEC:Agromaster 2 60 | 2 | 8.775   | ABCDEF          |
| ENTE C 4 10               | 2 | 8.765   | ABCDEF          |
| 1:2 ENTEC:Agromaster 2 35 | 2 | 8.755   | ABCDEF          |
| POC 0 35                  | 2 | 8.725   | ABCDEF          |
| Agromaster Tropical 0 60  | 1 | 8.72    | ABCDEFGHIJKLMNO |
| Urea 4 10                 | 3 | 8.71333 | ABCD            |
| POC 2 10                  | 2 | 8.615   | ABCDEF          |
| 2:1 ENTEC Agromater 4 10  | 2 | 8.605   | ABCDEF          |
| ENTE C 4 35               | 2 | 8.58    | ABCDEF          |
| Urea 0 35                 | 3 | 8.56333 | ABCDEF          |
| ENTE C 2 60               | 2 | 8.505   | ABCDEF          |
| POC 0 60                  | 2 | 8.495   | ABCDEF          |
| Urea 2 35                 | 3 | 8.3     | ABCDEF          |
| ENTE C 6 10               | 2 | 8.275   | ABCDEF          |
| Agromaster Tropical 2 10  | 2 | 8.26    | ABCDEF          |

|                            |   |         |                          |
|----------------------------|---|---------|--------------------------|
| 2:1 ENTEC Agromater 4 35   | 2 | 8.23    | ABCDEFGHIJKLMNO PQ       |
| ENTE C 4 60                | 2 | 8.18    | ABCDEFGHIJKLMNO PQR      |
| 1:2 ENTEC:Agromaster 4 10  | 2 | 7.94    | ABCDEFGHIJKLMNO PQRS     |
| Urea 6 10                  | 3 | 7.93667 | ABCDEFGHIJKLMNO PQR      |
| 2:1 ENTEC Agromater 4 60   | 2 | 7.72    | ABCDEFGHIJKLMNO QRST     |
| ENTE C 8 10                | 2 | 7.69    | ABCDEFGHIJKLMNO QRST     |
| 2:1 ENTEC Agromater 6 10   | 2 | 7.625   | ABCDEFGHIJKLMNO QRSTU    |
| 1:2 ENTEC:Agromaster 4 35  | 2 | 7.41    | BCDEFGHIJKLMNO QRSTUVW   |
| ENTE C 10 10               | 2 | 7.325   | CDEFGHIJKLMNO QRSTUVWX   |
| Urea 8 10                  | 3 | 7.28333 | DEFGHIJKLMNO QRSTUV      |
| Agromaster Tropical 4 10   | 2 | 7.1     | EFGHIJKLMNO QRSTUVWXYZ   |
| POC 2 35                   | 2 | 7.09    | EFGHIJKLMNO QRSTUVWXYZ   |
| 2:1 ENTEC Agromater 8 10   | 2 | 7.015   | FGHIJKLMNO QRSTUVWXYZ    |
| POC 4 10                   | 2 | 7.01    | GHIJKLMNO QRSTUVWXYZ     |
| Agromaster Tropical 2 35   | 2 | 6.97    | HJKLMNO QRSTUVWXYZAA     |
| Urea 10 10                 | 3 | 6.93667 | IJK OPQRSTUVWXYZ         |
| 1:2 ENTEC:Agromaster 6 10  | 2 | 6.88    | IJKLMNO QRSTUVWXYZAA     |
| Agromaster Tropical 6 10   | 2 | 6.88    | IJKLMNO QRSTUVWXYZAA     |
| Agromaster Tropical 8 10   | 2 | 6.85    | IJK MNOPQRSTUVWXYZAAAB   |
| Urea 2 60                  | 2 | 6.82    | IJK NOPQRSTUVWXYZAAAB    |
| Agromaster Tropical 10 10  | 2 | 6.815   | IJK OPQRSTUVWXYZAAAB     |
| 2:1 ENTEC Agromater 10 10  | 2 | 6.735   | JK OPQRSTUVWXYZAAAB      |
| Urea 0 60                  | 2 | 6.675   | K PQRSTUVWXYZAAABAC      |
| 1:2 ENTEC:Agromaster 8 10  | 2 | 6.65    | K PQRSTUVWXYZAAABAC      |
| POC 6 10                   | 2 | 6.65    | K PQRSTUVWXYZAAABAC      |
| Urea 4 35                  | 3 | 6.64333 | QRSTUVWXYZAAAB           |
| 1:2 ENTEC:Agromaster 10 10 | 2 | 6.545   | PQRSTUVWXYZAAABAC        |
| POC 8 10                   | 2 | 6.545   | PQRSTUVWXYZAAABAC        |
| POC 10 10                  | 2 | 6.525   | PQRSTUVWXYZAAABACAD      |
| Agromaster Tropical 2 60   | 2 | 6.445   | RSTUVWXYZAAABACADAE      |
| POC 2 60                   | 2 | 6.325   | STUVWXYZAAABACADAE       |
| Agromaster Tropical 10 60  | 1 | 6.31    | K OPQRSTUVWXYZAAABACADAE |
| ENTE C 6 60                | 2 | 6.28    | STUVWXYZAAABACADAE       |
| ENTE C 6 35                | 2 | 6.24    | STUVWXYZAAABACADAE       |
| 1:2 ENTEC:Agromaster 10 35 | 2 | 6.205   | STUVWXYZAAABACADAE       |
| POC 10 35                  | 2 | 6.145   | TUVWXYZAAABACADAE        |
| POC 10 60                  | 2 | 6.12    | TUVWXYZAAABACADAE        |
| Agromaster Tropical 8 60   | 2 | 6.115   | TUVWXYZAAABACADAE        |
| 1:2 ENTEC:Agromaster 8 35  | 2 | 6.08    | TUVWXYZAAABACADAE        |
| Agromaster Tropical 8 35   | 2 | 6.075   | TUVWXYZAAABACADAE        |
| POC 8 35                   | 2 | 5.99    | TUVWXYZAAABACADAE        |
| 2:1 ENTEC Agromater 10 35  | 2 | 5.925   | UVWXYZAAABACADAE         |
| 2:1 ENTEC Agromater 6 35   | 2 | 5.87    | UVWXYZAAABACADAE         |
| 1:2 ENTEC:Agromaster 6 35  | 2 | 5.84    | VWXYZAAABACADAE          |

|                            |   |       |                 |
|----------------------------|---|-------|-----------------|
| Agromaster Tropical 6 35   | 2 | 5.815 | VWXYZAAABACADAE |
| Urea 10 35                 | 3 | 5.77  | XYZAAABACADAE   |
| 2:1 ENTEC Agromater 10 60  | 2 | 5.755 | VWXYZAAABACADAE |
| ENTEK 10 35                | 2 | 5.735 | VWXYZAAABACADAE |
| Agromaster Tropical 6 60   | 2 | 5.72  | VWXYZAAABACADAE |
| Agromaster Tropical 10 35  | 2 | 5.695 | VWXYZAAABACADAE |
| ENTEK 10 60                | 2 | 5.67  | WXYZAAABACADAE  |
| POC 8 60                   | 2 | 5.67  | WXYZAAABACADAE  |
| POC 4 35                   | 2 | 5.665 | WXYZAAABACADAE  |
| Urea 6 35                  | 3 | 5.66  | YZAAABACADAE    |
| 1:2 ENTEC:Agromaster 4 60  | 2 | 5.625 | XYZAAABACADAE   |
| Urea 10 60                 | 2 | 5.61  | XYZAAABACADAE   |
| 1:2 ENTEC:Agromaster 10 60 | 2 | 5.585 | XYZAAABACADAE   |
| 1:2 ENTEC:Agromaster 8 60  | 2 | 5.5   | YZAAABACADAE    |
| 2:1 ENTEC Agromater 8 35   | 2 | 5.46  | YZAAABACADAE    |
| Urea 8 35                  | 3 | 5.39  | AAABACADAE      |
| 2:1 ENTEC Agromater 6 60   | 2 | 5.375 | YZAAABACADAE    |
| ENTEK 8 35                 | 2 | 5.355 | YZAAABACADAE    |
| POC 6 60                   | 2 | 5.295 | ZAAABACADAE     |
| POC 6 35                   | 2 | 5.285 | ZAAABACADAE     |
| ENTEK 8 60                 | 2 | 5.24  | AAABACADAE      |
| POC 4 60                   | 2 | 5.235 | AAABACADAE      |
| 2:1 ENTEC Agromater 8 60   | 2 | 5.23  | AAABACADAE      |
| Agromaster Tropical 4 35   | 2 | 5.21  | AAABACADAE      |
| Agromaster Tropical 4 60   | 2 | 5.115 | ABACADAE        |
| Urea 4 60                  | 2 | 5.09  | ABACADAE        |
| Urea 8 60                  | 2 | 4.95  | ACADAE          |
| Urea 6 60                  | 2 | 4.765 | ADAE            |
| 1:2 ENTEC:Agromaster 6 60  | 2 | 4.71  | AE              |

Means that do not share a letter are significantly different.

## Electrical conductivity (EC)

### Factor Information

| Factor    | Type  | Levels | Values                                                                           |
|-----------|-------|--------|----------------------------------------------------------------------------------|
| Treatment | Fixed | 6      | 1:2 ENTEC:Agromaster, 2:1 ENTEC Agromater, Agromaster Tropical, ENTEK, POC, Urea |
| Zone      | Fixed | 6      | 0, 2, 4, 6, 8, 10                                                                |
| Time      | Fixed | 3      | 10, 35, 60                                                                       |



## Ferralsol

### Analysis of Variance

| Source              | DF  | Adj SS  | Adj MS | F-Value | P-Value |
|---------------------|-----|---------|--------|---------|---------|
| Treatment           | 5   | 100263  | 20053  | 5.53    | 0.000   |
| Zone                | 5   | 4726502 | 945300 | 260.69  | 0.000   |
| Time                | 2   | 352450  | 176225 | 48.60   | 0.000   |
| Treatment*Zone      | 25  | 547745  | 21910  | 6.04    | 0.000   |
| Treatment*Time      | 10  | 1357900 | 135790 | 37.45   | 0.000   |
| Zone*Time           | 10  | 420106  | 42011  | 11.59   | 0.000   |
| Treatment*Zone*Time | 50  | 1001291 | 20026  | 5.52    | 0.000   |
| Error               | 119 | 431504  | 3626   |         |         |
| Total               | 226 | 9165390 |        |         |         |

### Model Summary

| S       | R-sq   | R-sq(adj) | R-sq(pred) |
|---------|--------|-----------|------------|
| 60.2170 | 95.29% | 91.06%    | *          |

### Tukey Pairwise Comparisons: Treatment Grouping Information Using the Tukey Method and 95% Confidence

| Treatment            | N  | Mean    | Grouping |
|----------------------|----|---------|----------|
| ENTEC                | 36 | 412.778 | A        |
| Urea                 | 48 | 401.398 | A        |
| 2:1 ENTEC Agromater  | 35 | 399.667 | A        |
| 1:2 ENTEC:Agromaster | 36 | 385.667 | A B      |
| POC                  | 36 | 375.444 | A B      |
| Agromaster Tropical  | 36 | 347.389 | B        |

Means that do not share a letter are significantly different.

### Tukey Pairwise Comparisons: Zone Grouping Information Using the Tukey Method and 95% Confidence

| Zone | N  | Mean    | Grouping |
|------|----|---------|----------|
| 0    | 37 | 622.185 | A        |
| 2    | 38 | 517.120 | B        |
| 4    | 38 | 415.426 | C        |

|    |    |         |   |
|----|----|---------|---|
| 6  | 38 | 310.528 | D |
| 8  | 38 | 241.861 | E |
| 10 | 38 | 215.222 | E |

Means that do not share a letter are significantly different.

### Tukey Pairwise Comparisons: Time Grouping Information Using the Tukey Method and 95% Confidence

| Time | N  | Mean    | Grouping |
|------|----|---------|----------|
| 60   | 71 | 443.681 | A        |
| 10   | 78 | 365.111 | B        |
| 35   | 78 | 352.380 | B        |

Means that do not share a letter are significantly different.

### Tukey Pairwise Comparisons: Treatment\*Zone\*Time Grouping Information Using the Tukey Method and 95% Confidence

| Treatment*Zone*Time       | N | Mean    | Grouping |
|---------------------------|---|---------|----------|
| Agromaster Tropical 0 60  | 2 | 896     | A        |
| 1:2 ENTEC:Agromaster 0 10 | 2 | 836.5   | AB       |
| Urea 0 10                 | 3 | 829.667 | AB       |
| ENTEC 2 10                | 2 | 823.5   | AB       |
| Agromaster Tropical 2 60  | 2 | 786     | ABC      |
| ENTEC 0 10                | 2 | 781.5   | ABCD     |
| 2:1 ENTEC Agromater 0 10  | 2 | 767     | ABCD     |
| POC 2 60                  | 2 | 762.5   | ABCD     |
| Agromaster Tropical 0 35  | 2 | 745.5   | ABCDE    |
| POC 0 60                  | 2 | 745     | ABCDE    |
| Urea 2 10                 | 3 | 696.667 | ABCDEF   |
| POC 0 35                  | 2 | 688.5   | ABCDEF   |
| POC 0 10                  | 2 | 680.5   | ABCDEF   |
| 2:1 ENTEC Agromater 2 10  | 2 | 671     | ABCDEF   |
| 1:2 ENTEC:Agromaster 0 60 | 2 | 663     | ABCDEF   |
| ENTEC 4 10                | 2 | 646.5   | ABCDEF   |
| Urea 4 10                 | 3 | 634.667 | BCDEF    |
| 1:2 ENTEC:Agromaster 0 35 | 2 | 621     | BCDEF    |
| Agromaster Tropical 2 35  | 2 | 608     | BCDEF    |
| Agromaster Tropical 4 60  | 2 | 600     | BCDEF    |
| 1:2 ENTEC:Agromaster 2 60 | 2 | 539.5   | CDEF     |
| 2:1 ENTEC Agromater 0 35  | 2 | 523     | CDEF     |
| 2:1 ENTEC Agromater 0 60  | 1 | 522     | BCDEF    |
| POC 2 35                  | 2 | 516     | DEF      |
| POC 4 60                  | 2 | 491     | EFG      |
| 2:1 ENTEC Agromater 4 10  | 2 | 488.5   | EFG      |

|                            |   |         |                       |
|----------------------------|---|---------|-----------------------|
| 1:2 ENTEC:Agromaster 4 60  | 2 | 488     | EFGHIJKLMNOP          |
| 2:1 ENTEC Agromater 2 60   | 2 | 486     | EFGHIJKLMNOP          |
| 2:1 ENTEC Agromater 4 60   | 2 | 481     | EFGHIJKLMNOP S        |
| 1:2 ENTEC:Agromaster 2 10  | 2 | 465     | FGHIJKLMNOPQ S        |
| Urea 4 60                  | 2 | 457     | FGHIJKLMNOPQRS        |
| ENTECC 4 60                | 2 | 432.5   | GHIJKLMNOPQRSTU       |
| 2:1 ENTEC Agromater 2 35   | 2 | 430     | GHIJKLMNOPQRSTU       |
| Urea 0 35                  | 3 | 428.667 | HIJKLMNOPQRS          |
| ENTECC 6 60                | 2 | 420     | GHIJKLMNOPQRSTUV      |
| Urea 2 35                  | 3 | 419     | IJKLMNOPQRS U         |
| ENTECC 0 60                | 2 | 411     | HIJKLMNOPQRSTUVW      |
| 2:1 ENTEC Agromater 6 60   | 2 | 409     | HIJKLMNOPQRSTUVW      |
| Urea 6 60                  | 2 | 407.5   | HIJKLMNOPQRSTUVW      |
| ENTECC 2 60                | 2 | 407     | HIJKLMNOPQRSTUVW      |
| 1:2 ENTEC:Agromaster 2 35  | 2 | 406.5   | HIJKLMNOPQRSTUVW      |
| POC 2 10                   | 2 | 402     | HIJKLMNOPQRSTUVW      |
| 1:2 ENTEC:Agromaster 6 60  | 2 | 400     | IJKLMNOPQRSTUVW       |
| ENTECC 2 35                | 2 | 399.5   | IJKLMNOPQRSTUVW       |
| Agromaster Tropical 6 60   | 2 | 397     | IJKLMNOPQRSTUVWX      |
| Urea 4 35                  | 3 | 388     | KLMNOPQRSTUVW         |
| ENTECC 0 35                | 2 | 387     | JKLMNOPQRSTUVWXY      |
| ENTECC 4 35                | 2 | 384.5   | JKLMNOPQRSTUVWXY      |
| ENTECC 6 10                | 2 | 382     | JKLMNOPQRSTUVWXY      |
| POC 6 60                   | 2 | 372     | KLMNOPQRSTUVWXYZ      |
| 2:1 ENTEC Agromater 4 35   | 2 | 366     | KLMNOPQRSTUVWXYZAAAB  |
| Urea 6 10                  | 3 | 365.333 | LMNOPQRSTUVWXY        |
| ENTECC 8 60                | 2 | 351     | LMNOPQRSTUVWXYZAAABAC |
| ENTECC 6 35                | 2 | 350     | LMNOPQRSTUVWXYZAAABAC |
| 1:2 ENTEC:Agromaster 10 60 | 2 | 348.5   | LMNOPQRSTUVWXYZAAABAC |
| 1:2 ENTEC:Agromaster 8 60  | 2 | 346.5   | LMNOPQRSTUVWXYZAAABAC |
| POC 4 35                   | 2 | 346     | LMNOPQRSTUVWXYZAAABAC |
| Urea 6 35                  | 3 | 344.667 | NOPQRSTUVWXYZAA       |
| Urea 8 60                  | 2 | 344     | LMNOPQRSTUVWXYZAAABAC |
| Agromaster Tropical 0 10   | 2 | 343     | LMNOPQRSTUVWXYZAAABAC |
| Agromaster Tropical 4 35   | 2 | 339     | LMNOPQRSTUVWXYZAAABAC |
| 2:1 ENTEC Agromater 8 60   | 2 | 335.5   | MNOPQRSTUVWXYZAAABAC  |
| Urea 0 60                  | 2 | 330.5   | NOPQRSTUVWXYZAAABAC   |
| 1:2 ENTEC:Agromaster 4 35  | 2 | 318     | NOPQRSTUVWXYZAAABAC   |
| Urea 2 60                  | 2 | 317.5   | NOPQRSTUVWXYZAAABAC   |
| POC 8 60                   | 2 | 317     | NOPQRSTUVWXYZAAABAC   |
| ENTECC 10 60               | 2 | 311.5   | NOPQRSTUVWXYZAAABAC   |
| Urea 10 60                 | 2 | 310     | NOPQRSTUVWXYZAAABAC   |
| 1:2 ENTEC:Agromaster 4 10  | 2 | 306.5   | NOPQRSTUVWXYZAAABAC   |
| 2:1 ENTEC Agromater 6 35   | 2 | 306.5   | NOPQRSTUVWXYZAAABAC   |
| 2:1 ENTEC Agromater 10 60  | 2 | 298     | NOPQRSTUVWXYZAAABAC   |

|                            |   |         |                     |
|----------------------------|---|---------|---------------------|
| POC 10 60                  | 2 | 296     | NOPQRSTUVWXYZAAABAC |
| 2:1 ENTEC Agromater 6 10   | 2 | 286     | NOPQRSTUVWXYZAAABAC |
| Urea 8 35                  | 3 | 283     | OPQRSTUVWXYZAAABAC  |
| Agromaster Tropical 8 60   | 2 | 283     | NOPQRSTUVWXYZAAABAC |
| ENTEK 8 35                 | 2 | 275.5   | NOPQRSTUVWXYZAAABAC |
| 1:2 ENTEC:Agromaster 6 35  | 2 | 265     | OPQRSTUVWXYZAAABAC  |
| ENTEK 10 35                | 2 | 257.5   | OPQRSTUVWXYZAAABAC  |
| Urea 10 35                 | 3 | 256.333 | PQRSTUVWXYZAAABAC   |
| POC 6 35                   | 2 | 255     | OPQRSTUVWXYZAAABAC  |
| 2:1 ENTEC Agromater 8 35   | 2 | 243     | PQRSTUVWXYZAAABAC   |
| 1:2 ENTEC:Agromaster 8 35  | 2 | 239.5   | PQRSTUVWXYZAAABAC   |
| 2:1 ENTEC Agromater 10 35  | 2 | 231     | PQRSTUVWXYZAAABAC   |
| ENTEK 8 10                 | 2 | 228.5   | PQRSTUVWXYZAAABAC   |
| 1:2 ENTEC:Agromaster 10 35 | 2 | 226.5   | PQRSTUVWXYZAAABAC   |
| Urea 8 10                  | 3 | 224     | QR TUVWXYZAAABAC    |
| Agromaster Tropical 6 35   | 2 | 212.5   | QRSTUVWXYZAAABAC    |
| Agromaster Tropical 10 60  | 2 | 210.5   | QR TUVWXYZAAABAC    |
| POC 4 10                   | 2 | 205.5   | QR TUVWXYZAAABAC    |
| POC 8 35                   | 2 | 198.5   | QR TUVWXYZAAABAC    |
| 1:2 ENTEC:Agromaster 6 10  | 2 | 197.5   | QR TUVWXYZAAABAC    |
| 2:1 ENTEC Agromater 8 10   | 2 | 195.5   | R TUVWXYZAAABAC     |
| Urea 10 10                 | 3 | 188.667 | T VWXYZAAABAC       |
| ENTEK 10 10                | 2 | 181     | TUVWXYZAAABAC       |
| Agromaster Tropical 2 10   | 2 | 172.5   | T VWXYZAAABAC       |
| POC 10 35                  | 2 | 155.5   | VWXYZAAABAC         |
| 2:1 ENTEC Agromater 10 10  | 2 | 155     | VWXYZAAABAC         |
| Agromaster Tropical 8 35   | 2 | 147     | WXYZAAABAC          |
| 1:2 ENTEC:Agromaster 8 10  | 2 | 144.5   | WXYZAAABAC          |
| 1:2 ENTEC:Agromaster 10 10 | 2 | 130     | XYZAAABAC           |
| POC 6 10                   | 2 | 126     | YZAAABAC            |
| Agromaster Tropical 10 35  | 2 | 124.5   | YZAAABAC            |
| Agromaster Tropical 4 10   | 2 | 105     | ZAAABAC             |
| POC 10 10                  | 2 | 101     | AAABAC              |
| POC 8 10                   | 2 | 100     | AAABAC              |
| Agromaster Tropical 8 10   | 2 | 97.5    | ABAC                |
| Agromaster Tropical 6 10   | 2 | 93.5    | AC                  |
| Agromaster Tropical 10 10  | 2 | 92.5    | AC                  |

Means that do not share a letter are significantly different.

## Vertisol

### Analysis of Variance

| Source              | DF  | Adj SS   | Adj MS  | F-Value | P-Value |
|---------------------|-----|----------|---------|---------|---------|
| Treatment           | 5   | 805530   | 161106  | 8.12    | 0.000   |
| Zone                | 5   | 14540744 | 2908149 | 146.62  | 0.000   |
| Time                | 2   | 2238515  | 1119257 | 56.43   | 0.000   |
| Treatment*Zone      | 25  | 1538978  | 61559   | 3.10    | 0.000   |
| Treatment*Time      | 10  | 1005738  | 100574  | 5.07    | 0.000   |
| Zone*Time           | 10  | 805730   | 80573   | 4.06    | 0.000   |
| Treatment*Zone*Time | 50  | 1496867  | 29937   | 1.51    | 0.037   |
| Error               | 117 | 2320694  | 19835   |         |         |
| Total               | 224 | 25108389 |         |         |         |

## Model Summary

| S       | R-sq   | R-sq(adj) | R-sq(pred) |
|---------|--------|-----------|------------|
| 140.837 | 90.76% | 82.30%    | *          |

## Tukey Pairwise Comparisons: Treatment Grouping Information Using the Tukey Method and 95% Confidence

| Treatment            | N  | Mean    | Grouping |
|----------------------|----|---------|----------|
| Urea                 | 48 | 636.296 | A        |
| POC                  | 36 | 573.250 | A B      |
| Agromaster Tropical  | 34 | 510.583 | B C      |
| 2:1 ENTEC Agromater  | 36 | 504.336 | B C      |
| ENTEC                | 36 | 482.444 | B C      |
| 1:2 ENTEC:Agromaster | 35 | 474.333 | C        |

Means that do not share a letter are significantly different.

## Tukey Pairwise Comparisons: Zone Grouping Information Using the Tukey Method and 95% Confidence

| Zone | N  | Mean    | Grouping |
|------|----|---------|----------|
| 0    | 36 | 1035.77 | A        |
| 2    | 38 | 681.23  | B        |
| 4    | 38 | 508.92  | C        |
| 6    | 38 | 377.17  | D        |
| 8    | 38 | 309.04  | D E      |

10 37 269.12 E

Means that do not share a letter are significantly different.

### Tukey Pairwise Comparisons: Time Grouping Information Using the Tukey Method and 95% Confidence

| Time | N  | Mean    | Grouping |
|------|----|---------|----------|
| 60   | 70 | 616.222 | A        |
| 35   | 77 | 585.102 | A        |
| 10   | 78 | 389.298 | B        |

Means that do not share a letter are significantly different.

### Tukey Pairwise Comparisons: Treatment\*Zone\*Time Grouping Information Using the Tukey Method and 95% Confidence

| Treatment*Zone*Time       | N | Mean   | Grouping           |
|---------------------------|---|--------|--------------------|
| POC 0 35                  | 2 | 1566.5 | A                  |
| Agromaster Tropical 0 35  | 2 | 1468   | AB                 |
| 1:2 ENTEC:Agromaster 0 35 | 1 | 1452   | ABC                |
| Agromaster Tropical 0 60  | 1 | 1281   | ABCDEF             |
| POC 0 10                  | 2 | 1260   | ABCD               |
| Urea 0 10                 | 3 | 1186   | ABCDE              |
| 2:1 ENTEC Agromater 0 10  | 2 | 1124.5 | ABCDEFG            |
| POC 0 60                  | 2 | 1105   | ABCDEFGH           |
| Agromaster Tropical 2 60  | 2 | 1031.5 | ABCDEFGHI          |
| Urea 0 60                 | 2 | 970.5  | ABCDEFGHIJ         |
| 2:1 ENTEC Agromater 0 35  | 2 | 961    | ABCDEFGHIJKL       |
| Urea 2 35                 | 3 | 913    | BCDEFGHIJK         |
| Urea 2 10                 | 3 | 901.67 | BCDEFGHIJKL        |
| 1:2 ENTEC:Agromaster 0 10 | 2 | 895    | BCDEFGHIJKLMN      |
| Urea 0 35                 | 3 | 894.33 | BCDEFGHIJKLM       |
| POC 2 60                  | 2 | 884    | BCDEFGHIJKLMNO     |
| Urea 4 60                 | 2 | 871    | BCDEFGHIJKLMNO     |
| 1:2 ENTEC:Agromaster 0 60 | 2 | 855.5  | BCDEFGHIJKLMNOP    |
| ENTEK 0 10                | 2 | 855    | BCDEFGHIJKLMNOP    |
| Urea 2 60                 | 2 | 850.5  | BCDEFGHIJKLMNOP    |
| Agromaster Tropical 2 35  | 2 | 807.5  | CDEFGHIJKLMNOPQ    |
| 2:1 ENTEC Agromater 0 60  | 2 | 800    | CDEFGHIJKLMNOPQ    |
| POC 2 35                  | 2 | 787.5  | CDEFGHIJKLMNOPQR   |
| Urea 4 35                 | 3 | 784    | CDEFGHIJKLMNOP     |
| 2:1 ENTEC Agromater 2 10  | 2 | 781    | CDEFGHIJKLMNOPQRS  |
| ENTEK 0 35                | 2 | 736    | CDEFGHIJKLMNOPQRST |

|                            |   |        |                     |
|----------------------------|---|--------|---------------------|
| Agromaster Tropical 4 60   | 2 | 710.5  | CDEFGHIJKLMNOPQRSTU |
| 2:1 ENTEC Agromater 2 60   | 2 | 673    | DEFGHIJKLMNOPQRSTU  |
| ENTEK 2 10                 | 2 | 661    | DEFGHIJKLMNOPQRSTU  |
| Urea 6 60                  | 2 | 657    | DEFGHIJKLMNOPQRSTU  |
| Agromaster Tropical 0 10   | 2 | 626.5  | EFGHIJKLMNOPQRSTU   |
| POC 4 60                   | 2 | 617    | EFGHIJKLMNOPQRSTU   |
| ENTEK 2 35                 | 2 | 617    | EFGHIJKLMNOPQRSTU   |
| POC 4 35                   | 2 | 609.5  | FGHIJKLMNOPQRSTU    |
| Agromaster Tropical 4 35   | 2 | 609    | FGHIJKLMNOPQRSTU    |
| ENTEK 0 60                 | 2 | 607    | FGHIJKLMNOPQRSTU    |
| 1:2 ENTEC:Agromaster 4 60  | 2 | 590.5  | FGHIJKLMNOPQRSTU    |
| 2:1 ENTEC Agromater 2 35   | 2 | 581.5  | FGHIJKLMNOPQRSTU    |
| ENTEK 4 35                 | 2 | 581    | FGHIJKLMNOPQRSTU    |
| Urea 4 10                  | 3 | 573    | FGHIJKLMNOPQRSTU    |
| 1:2 ENTEC:Agromaster 2 35  | 2 | 571    | FGHIJKLMNOPQRSTU    |
| 2:1 ENTEC Agromater 4 60   | 2 | 560.5  | FGHIJKLMNOPQRSTU    |
| Urea 6 35                  | 3 | 557.33 | FGHIJKLMNOPQRSTU    |
| ENTEK 2 60                 | 2 | 555.5  | FGHIJKLMNOPQRSTU    |
| 1:2 ENTEC:Agromaster 2 60  | 2 | 541.5  | FGHIJKLMNOPQRSTU    |
| Urea 8 60                  | 2 | 541    | FGHIJKLMNOPQRSTU    |
| ENTEK 4 60                 | 2 | 533    | FGHIJKLMNOPQRSTU    |
| POC 6 60                   | 2 | 516.5  | FGHIJKLMNOPQRSTU    |
| ENTEK 4 10                 | 2 | 503    | GHIJKLMNOPQRSTU     |
| Urea 10 60                 | 2 | 498    | GHIJKLMNOPQRSTU     |
| POC 6 35                   | 2 | 493.5  | HIJKLMNOPQRSTU      |
| ENTEK 6 60                 | 2 | 491.5  | HIJKLMNOPQRSTU      |
| 2:1 ENTEC Agromater 6 60   | 2 | 491    | HIJKLMNOPQRSTU      |
| Agromaster Tropical 6 60   | 2 | 483.5  | HIJKLMNOPQRSTU      |
| 1:2 ENTEC:Agromaster 2 10  | 2 | 468.5  | IJKLMNOPQRSTU       |
| 1:2 ENTEC:Agromaster 6 60  | 2 | 456    | IJKLMNOPQRSTU       |
| 1:2 ENTEC:Agromaster 10 60 | 2 | 451    | IJKLMNOPQRSTU       |
| POC 8 60                   | 2 | 449.5  | IJKLMNOPQRSTU       |
| ENTEK 8 60                 | 2 | 448.5  | IJKLMNOPQRSTU       |
| 2:1 ENTEC Agromater 4 35   | 2 | 439.5  | IJKLMNOPQRSTU       |
| 2:1 ENTEC Agromater 8 60   | 2 | 438.5  | IJKLMNOPQRSTU       |
| ENTEK 6 35                 | 2 | 430.5  | IJKLMNOPQRSTU       |
| POC 2 10                   | 2 | 429    | IJKLMNOPQRSTU       |
| 1:2 ENTEC:Agromaster 8 60  | 2 | 427.5  | IJKLMNOPQRSTU       |
| Urea 8 35                  | 3 | 422.67 | JKLMNOPQRSTU        |
| Agromaster Tropical 6 35   | 2 | 399.5  | JKLMNOPQRSTU        |
| 2:1 ENTEC Agromater 10 60  | 2 | 399    | JKLMNOPQRSTU        |
| 2:1 ENTEC Agromater 4 10   | 2 | 392    | JKLMNOPQRSTU        |
| 2:1 ENTEC Agromater 6 35   | 2 | 390.5  | JKLMNOPQRSTU        |
| POC 10 60                  | 2 | 376.5  | JKLMNOPQRSTU        |
| 1:2 ENTEC:Agromaster 4 35  | 2 | 375    | JKLMNOPQRSTU        |

|                            |   |        |                    |
|----------------------------|---|--------|--------------------|
| ENTEC 8 35                 | 2 | 372    | JKLMNOPQRSTUVWXYZ  |
| Agromaster Tropical 8 60   | 2 | 368    | JKLMNOPQRSTUVWXYZ  |
| 2:1 ENTEC Agromater 8 35   | 2 | 357.5  | JKLMNOPQRSTUVWXYZ  |
| POC 8 35                   | 2 | 339    | KLMNOPQRSTUVWXYZ   |
| ENTEC 10 35                | 2 | 338    | KLMNOPQRSTUVWXYZ   |
| ENTEC 10 60                | 2 | 335.5  | LMNOPQRSTUVWXYZ    |
| 1:2 ENTEC:Agromaster 6 35  | 2 | 321    | MNOPQRSTUVWXYZ     |
| Agromaster Tropical 10 60  | 1 | 318    | IJKLMNOPQRSTUVWXYZ |
| Urea 10 35                 | 3 | 295.33 | PQRSTUVWXYZ        |
| POC 10 35                  | 2 | 291.5  | NOPQRSTUVWXYZ      |
| Agromaster Tropical 8 35   | 2 | 291.5  | NOPQRSTUVWXYZ      |
| ENTEC 6 10                 | 2 | 276    | NOPQRSTUVWXYZ      |
| Agromaster Tropical 10 35  | 2 | 263    | OPQRSTUVWXYZ       |
| 1:2 ENTEC:Agromaster 8 35  | 2 | 262    | OPQRSTUVWXYZ       |
| Urea 6 10                  | 3 | 256.67 | QRSTUVWXYZ         |
| 2:1 ENTEC Agromater 10 35  | 2 | 256    | OPQRSTUVWXYZ       |
| 1:2 ENTEC:Agromaster 10 35 | 2 | 229.5  | PQRSTUVWXYZ        |
| Agromaster Tropical 2 10   | 2 | 207.5  | QRSTUVWXYZ         |
| ENTEC 8 10                 | 2 | 199.5  | QRSTUVWXYZ         |
| 1:2 ENTEC:Agromaster 4 10  | 2 | 178    | QRSTUVWXYZ         |
| 2:1 ENTEC Agromater 6 10   | 2 | 169    | RSTUV              |
| 1:2 ENTEC:Agromaster 6 10  | 2 | 158.5  | RSTUV              |
| 1:2 ENTEC:Agromaster 8 10  | 2 | 156.5  | STUV               |
| POC 6 10                   | 2 | 153.5  | STUV               |
| POC 4 10                   | 2 | 153.5  | STUV               |
| 1:2 ENTEC:Agromaster 10 10 | 2 | 149    | TUV                |
| Urea 10 10                 | 3 | 147.33 | UV                 |
| ENTEC 10 10                | 2 | 144    | TUV                |
| POC 10 10                  | 2 | 143.5  | TUV                |
| POC 8 10                   | 2 | 143    | TUV                |
| 2:1 ENTEC Agromater 8 10   | 2 | 136.05 | TUV                |
| Urea 8 10                  | 3 | 134    | V                  |
| 2:1 ENTEC Agromater 10 10  | 2 | 127.5  | TUV                |
| Agromaster Tropical 6 10   | 2 | 87.5   | UV                 |
| Agromaster Tropical 10 10  | 2 | 81.5   | UV                 |
| Agromaster Tropical 4 10   | 2 | 80.5   | UV                 |
| Agromaster Tropical 8 10   | 2 | 76     | V                  |

Means that do not share a letter are significantly different.
